# Supplementary material for: Synthesis of phostones via DABCO-catalyzed bromocyclization of alkenylphosphonic acid monoesters
Source: Royal Society of Chemistry journal article supplement (doi:10.1039/c7ob01436h), 2017-01-01

## Supporting Information for

### Synthesis of phostones via DABCO-catalyzed bromocyclization of alkenylphosphonic acid monoesters

Haiyang Wang,<sup>a</sup> Liye Huang,<sup>a</sup> Xiaohui Cao,<sup>a</sup> Dacheng Liang and Ai-Yun Peng<sup>a\*</sup>

#### List of contents

|                                                                           |     |
|---------------------------------------------------------------------------|-----|
| <sup>1</sup> H / <sup>13</sup> C/ <sup>31</sup> P NMR spectra of 4a.....  | S2  |
| <sup>1</sup> H / <sup>13</sup> C/ <sup>31</sup> P NMR spectra of 4b.....  | S3  |
| <sup>1</sup> H / <sup>13</sup> C/ <sup>31</sup> P NMR spectra of 4c.....  | S5  |
| <sup>1</sup> H / <sup>13</sup> C/ <sup>31</sup> P NMR spectra of 4d.....  | S6  |
| <sup>1</sup> H / <sup>13</sup> C/ <sup>31</sup> P NMR spectra of 4e.....  | S8  |
| <sup>1</sup> H / <sup>13</sup> C/ <sup>31</sup> P NMR spectra of 4f.....  | S9  |
| <sup>1</sup> H / <sup>13</sup> C/ <sup>31</sup> P NMR spectra of 4g.....  | S11 |
| <sup>1</sup> H / <sup>13</sup> C/ <sup>31</sup> P NMR spectra of 6aa..... | S12 |
| <sup>1</sup> H / <sup>13</sup> C/ <sup>31</sup> P NMR spectra of 6ab..... | S14 |
| <sup>1</sup> H / <sup>13</sup> C/ <sup>31</sup> P NMR spectra of 6ba..... | S15 |
| <sup>1</sup> H / <sup>13</sup> C/ <sup>31</sup> P NMR spectra of 6ca..... | S17 |
| <sup>1</sup> H / <sup>13</sup> C/ <sup>31</sup> P NMR spectra of 6cb..... | S18 |
| <sup>1</sup> H / <sup>13</sup> C/ <sup>31</sup> P NMR spectra of 6da..... | S20 |
| <sup>1</sup> H / <sup>13</sup> C/ <sup>31</sup> P NMR spectra of 6db..... | S21 |
| <sup>1</sup> H / <sup>13</sup> C/ <sup>31</sup> P NMR spectra of 6ea..... | S23 |
| <sup>1</sup> H / <sup>13</sup> C/ <sup>31</sup> P NMR spectra of 6eb..... | S24 |
| <sup>1</sup> H / <sup>13</sup> C/ <sup>31</sup> P NMR spectra of 6fa..... | S26 |
| <sup>1</sup> H / <sup>13</sup> C/ <sup>31</sup> P NMR spectra of 6fb..... | S27 |
| <sup>1</sup> H / <sup>13</sup> C/ <sup>31</sup> P NMR spectra of 6ga..... | S29 |
| <sup>1</sup> H / <sup>13</sup> C/ <sup>31</sup> P NMR spectra of 6gb..... | S30 |
| NOE spectra for 6aa.....                                                  | S32 |
| NOE spectra for 6ab.....                                                  | S34 |
| NOE spectra for 6ca.....                                                  | S36 |
| NOE spectra for 6cb.....                                                  | S37 |
| X-Ray crystallography of 6ba.....                                         | S38 |

<sup>1</sup>H NMR (300 MHz, CDCl<sub>3</sub>) of **4a**

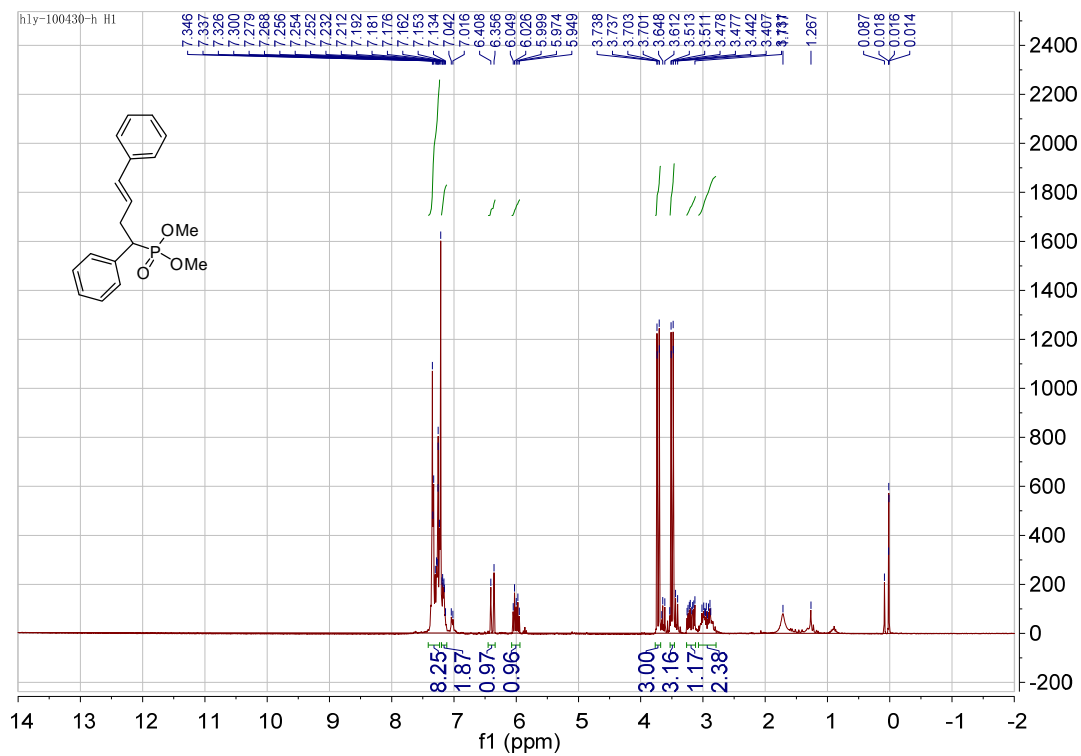

<sup>31</sup>P NMR (121 MHz, CDCl<sub>3</sub>) of **4a**

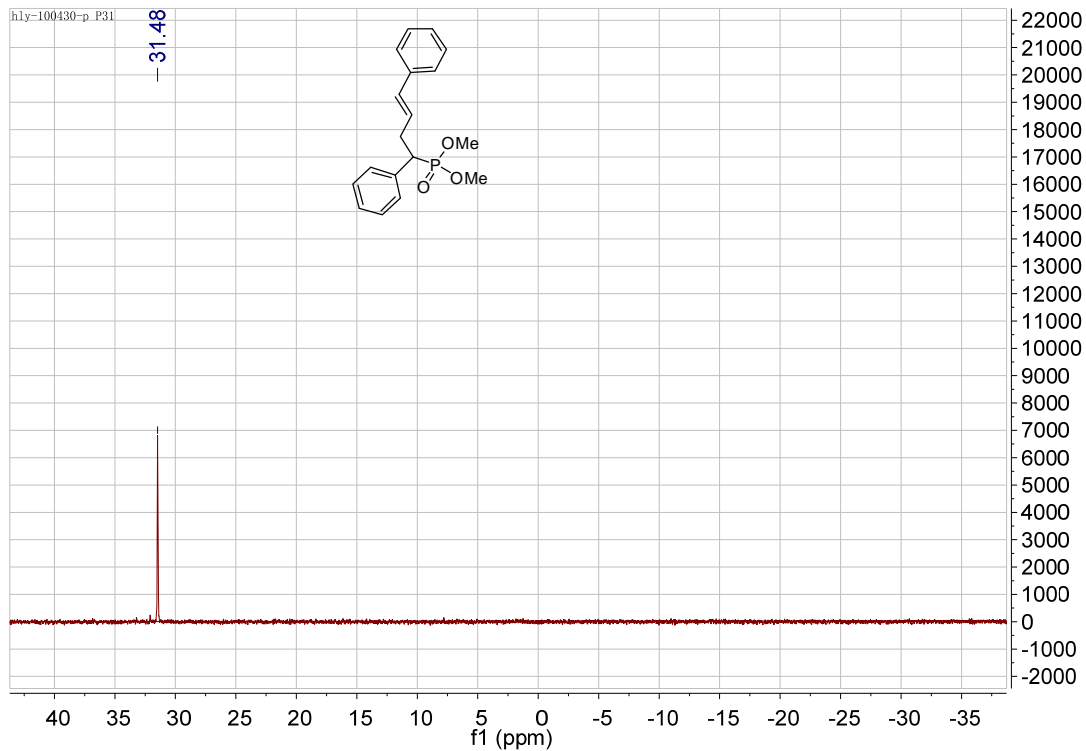

<sup>13</sup>C NMR (75 MHz, CDCl<sub>3</sub>) of **4a**

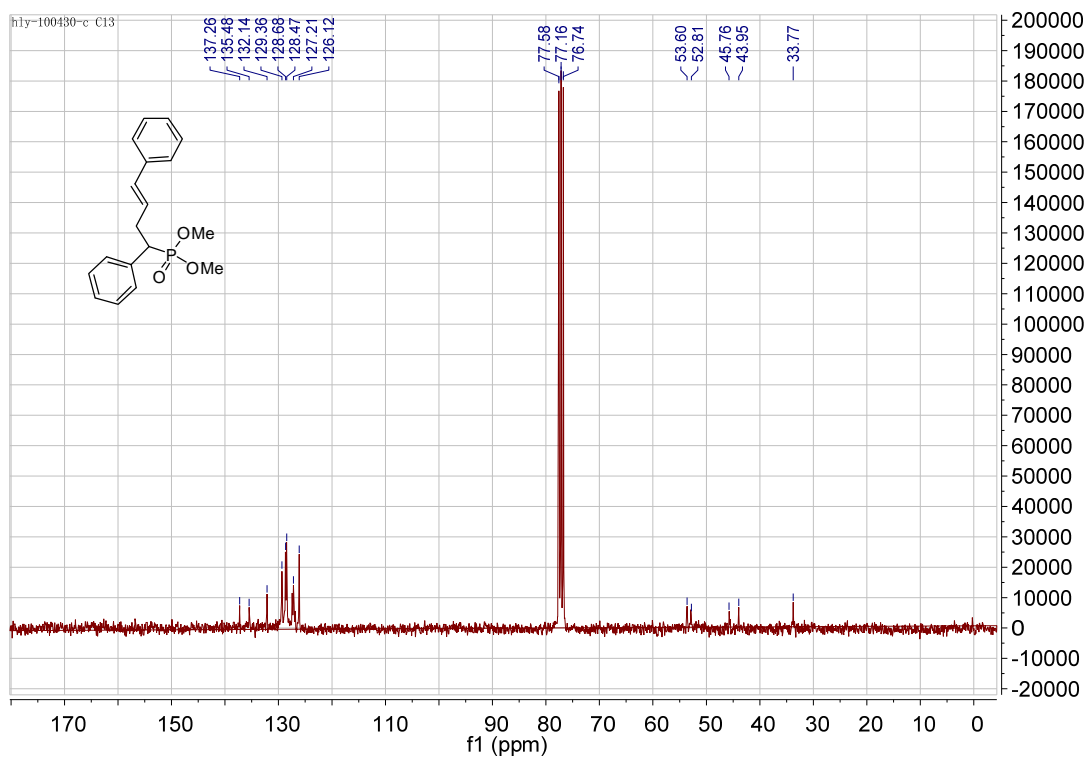

<sup>1</sup>H NMR (300 MHz, CDCl<sub>3</sub>) of **4b**

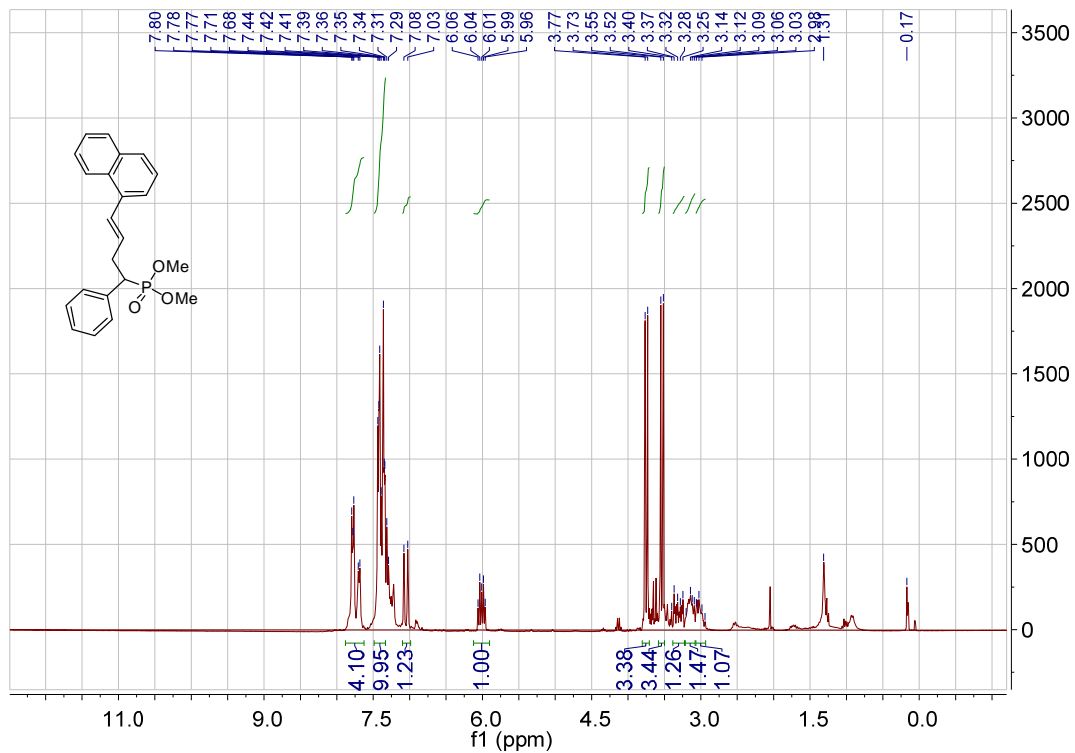

<sup>31</sup>P NMR (121 MHz, CDCl<sub>3</sub>) of **4b**

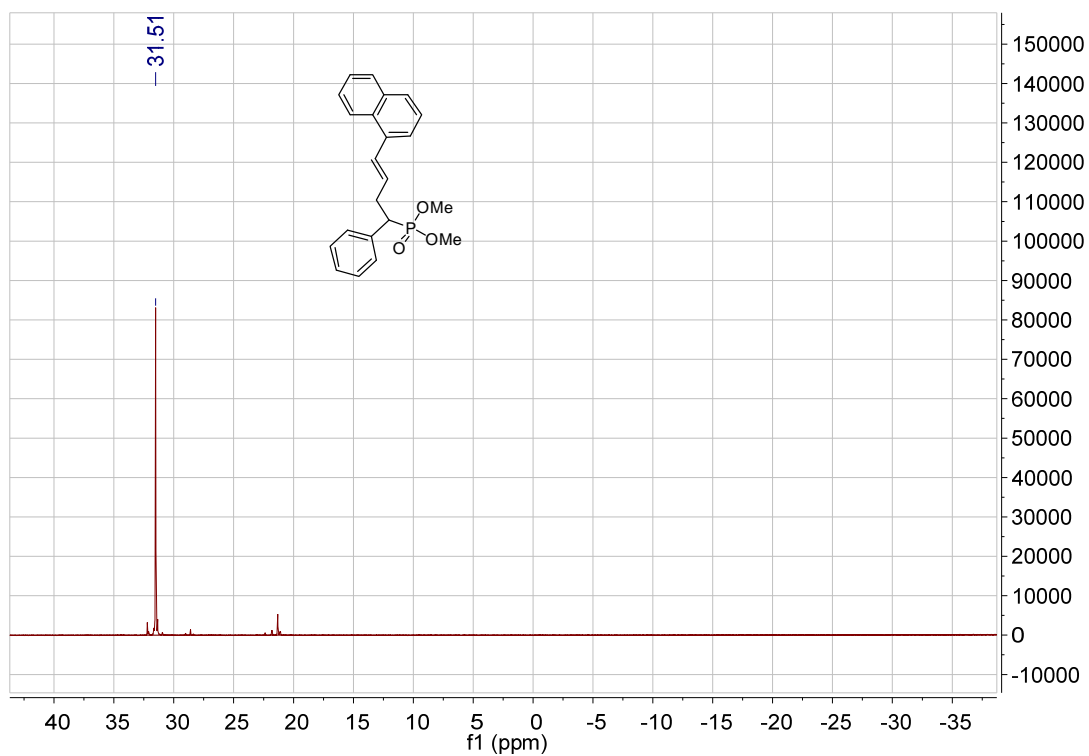

<sup>13</sup>C NMR (75 MHz, CDCl<sub>3</sub>) of **4b**

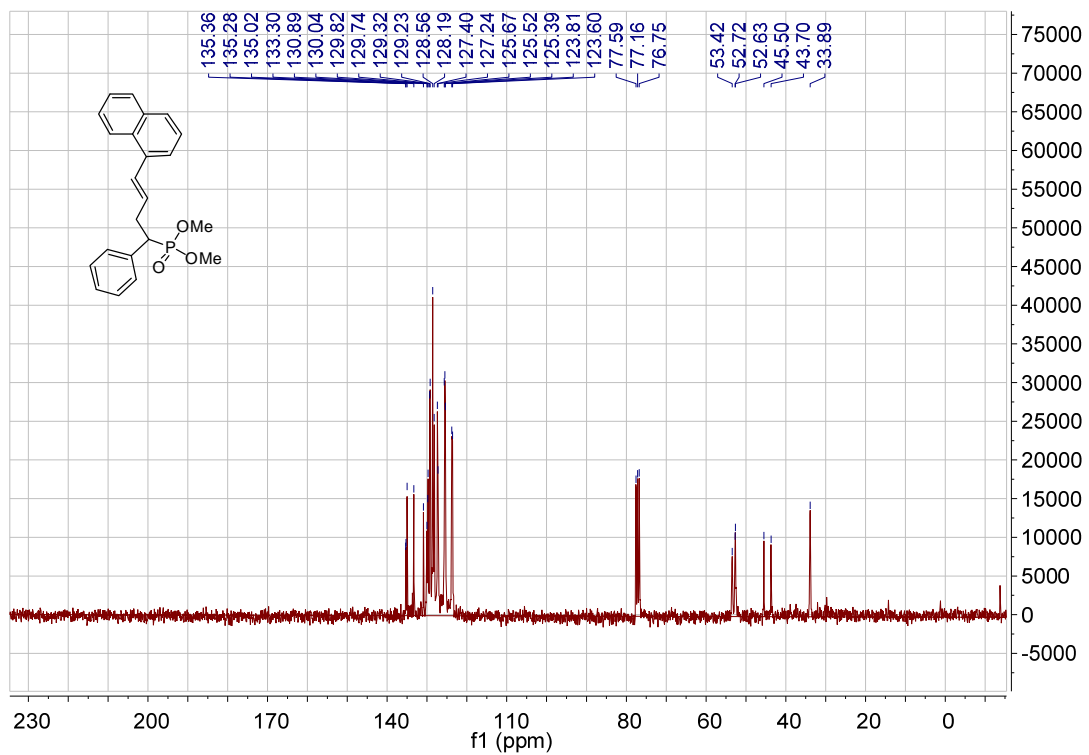

<sup>1</sup>H NMR (400 MHz, CDCl<sub>3</sub>) of **4c**

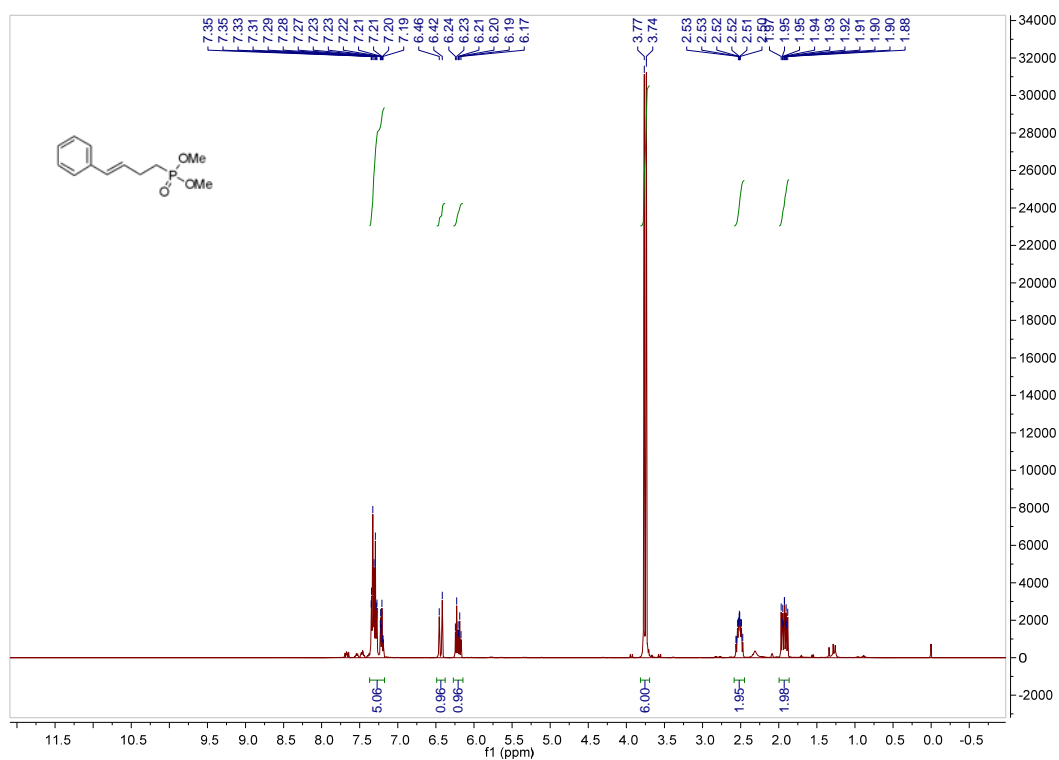

<sup>31</sup>P NMR (162 MHz, CDCl<sub>3</sub>) of **4c**

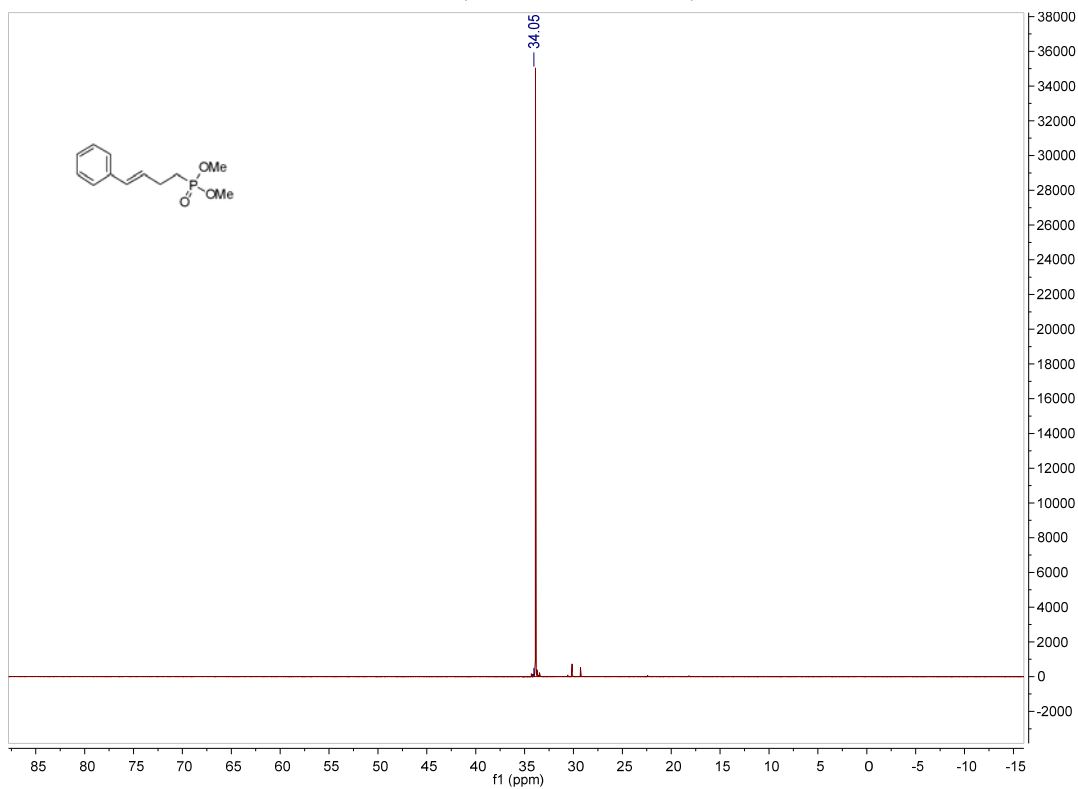

<sup>13</sup>C NMR (101 MHz, CDCl<sub>3</sub>) of **4c**

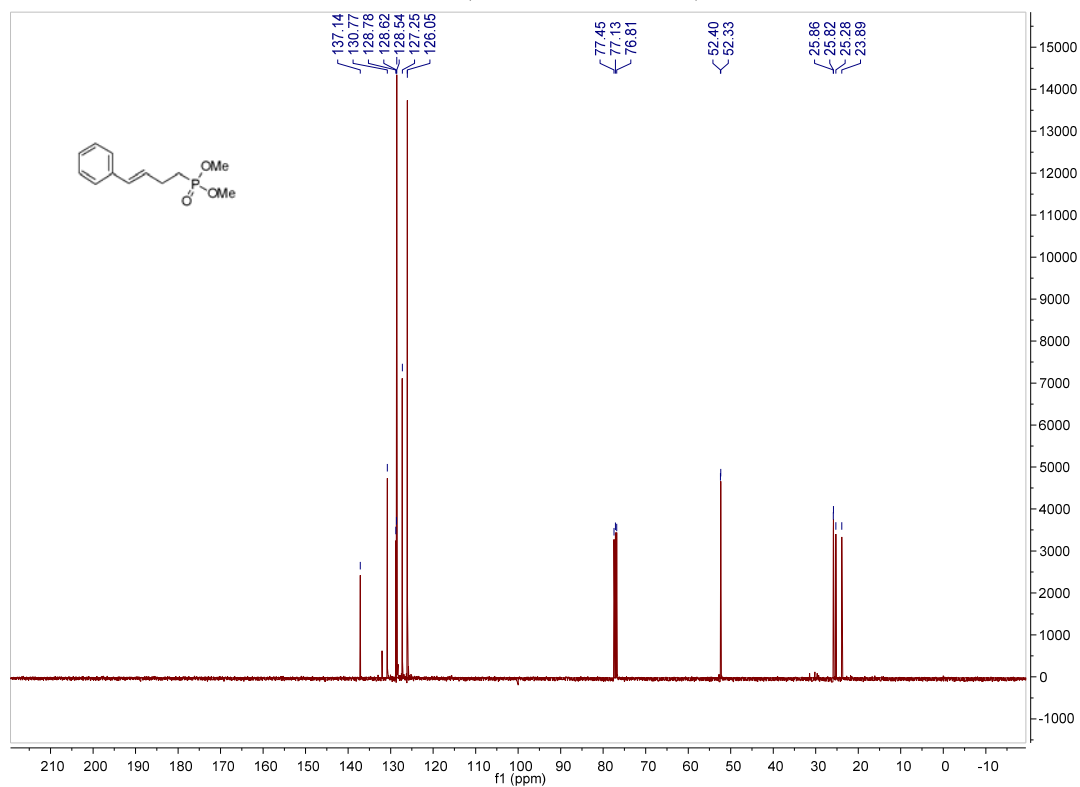

<sup>1</sup>H NMR (400 MHz, CDCl<sub>3</sub>) of **4d**

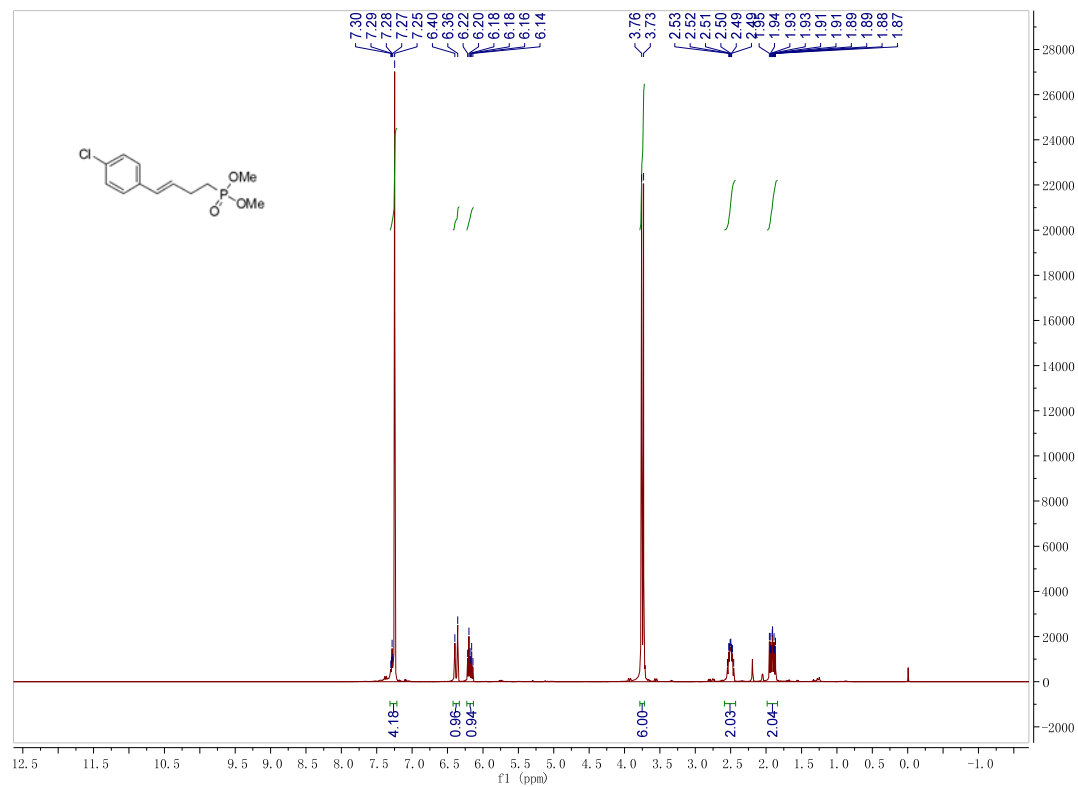

<sup>31</sup>P NMR (162 MHz, CDCl<sub>3</sub>) of **4d**

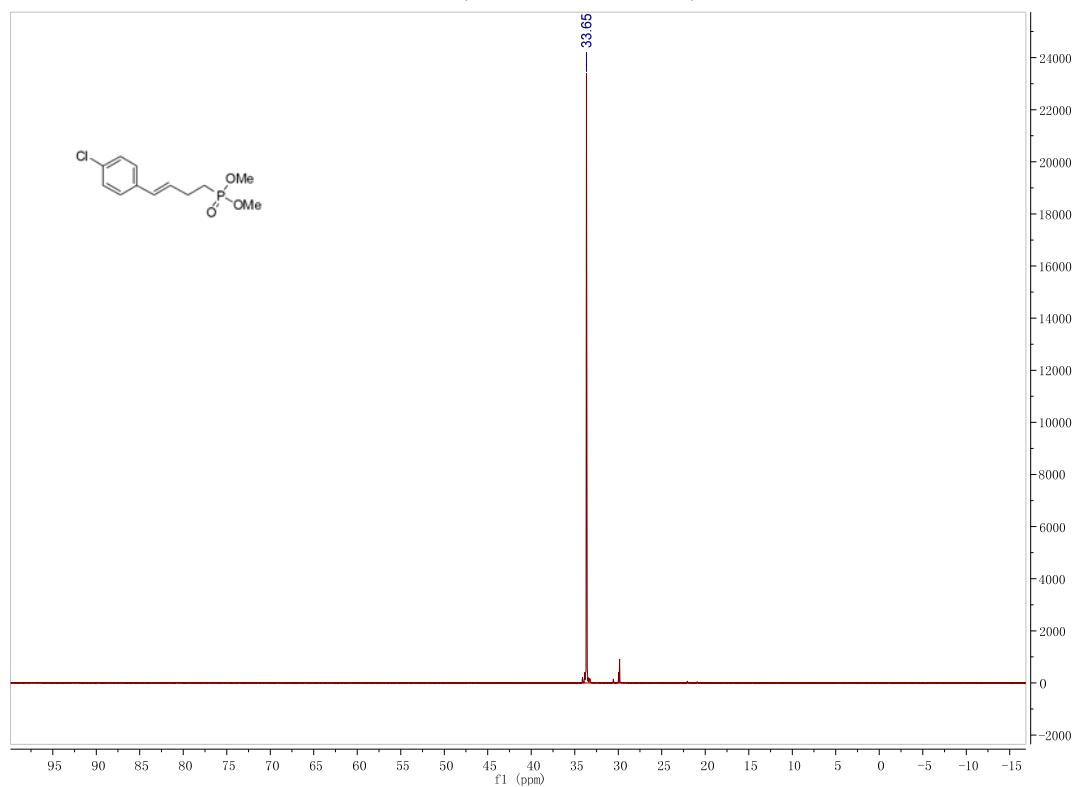

<sup>13</sup>C NMR (101 MHz, CDCl<sub>3</sub>) of **4d**

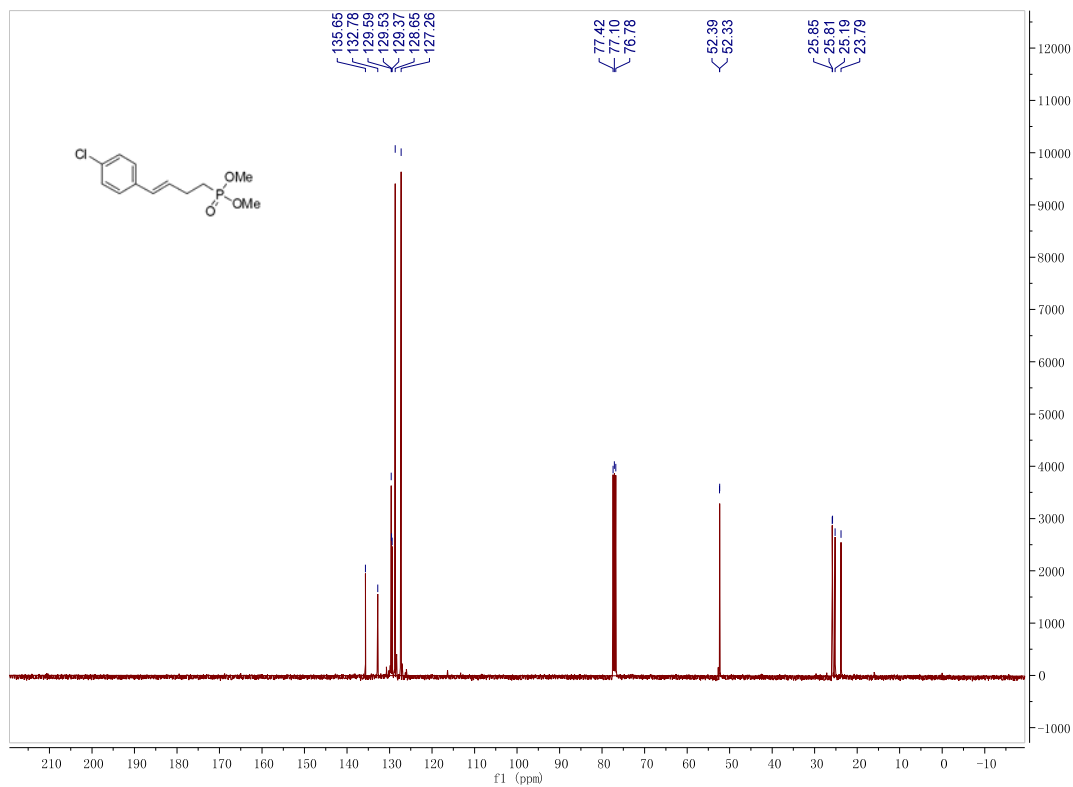

<sup>1</sup>H NMR (400 MHz, CDCl<sub>3</sub>) of **4e**

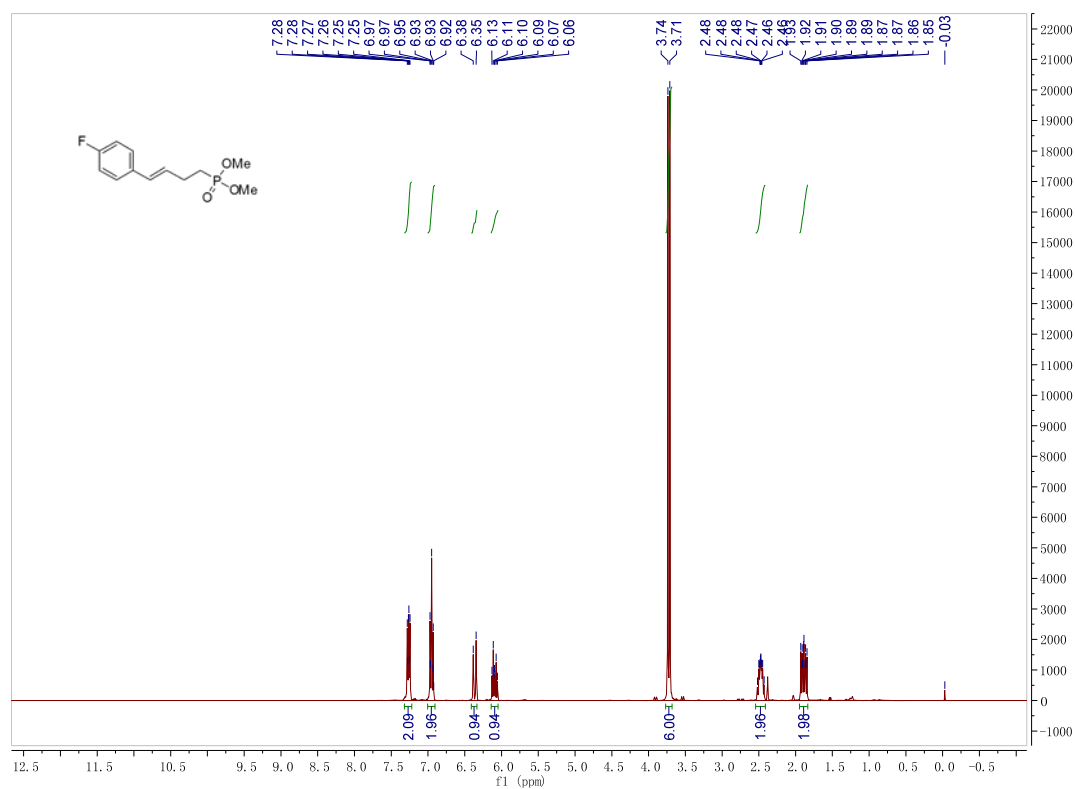

<sup>31</sup>P NMR (162 MHz, CDCl<sub>3</sub>) of **4e**

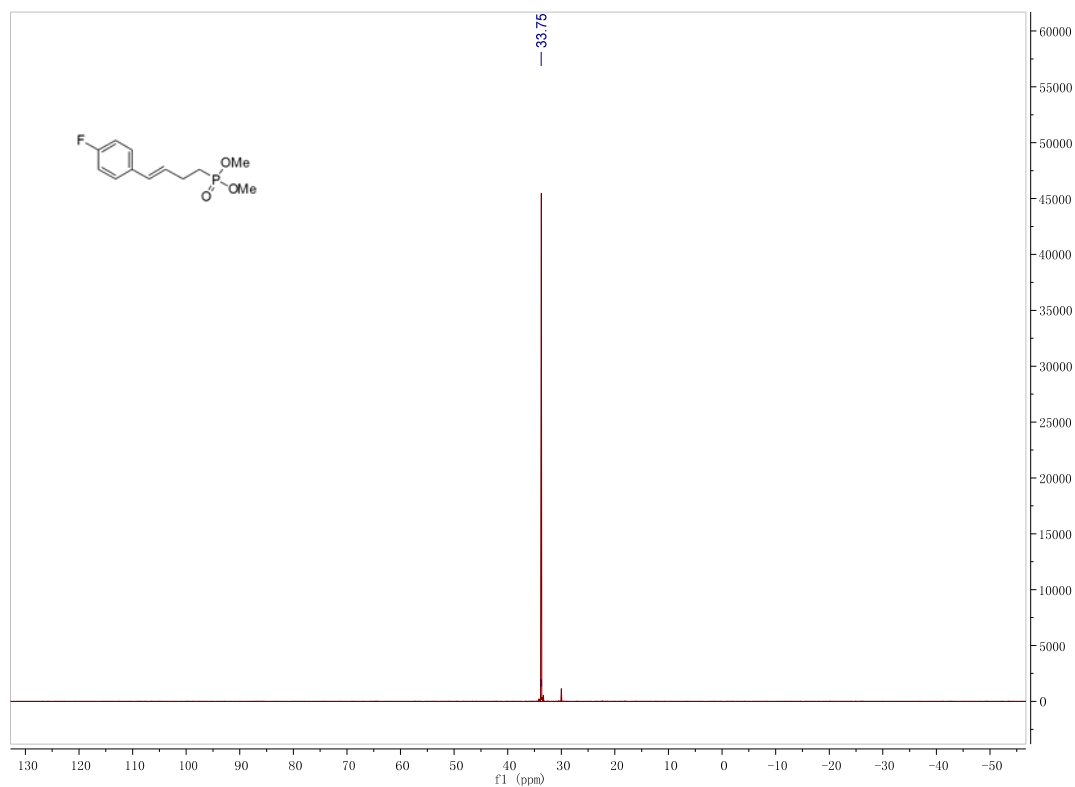



$^{13}\text{C}$  NMR (101 MHz,  $\text{CDCl}_3$ ) of **4e**

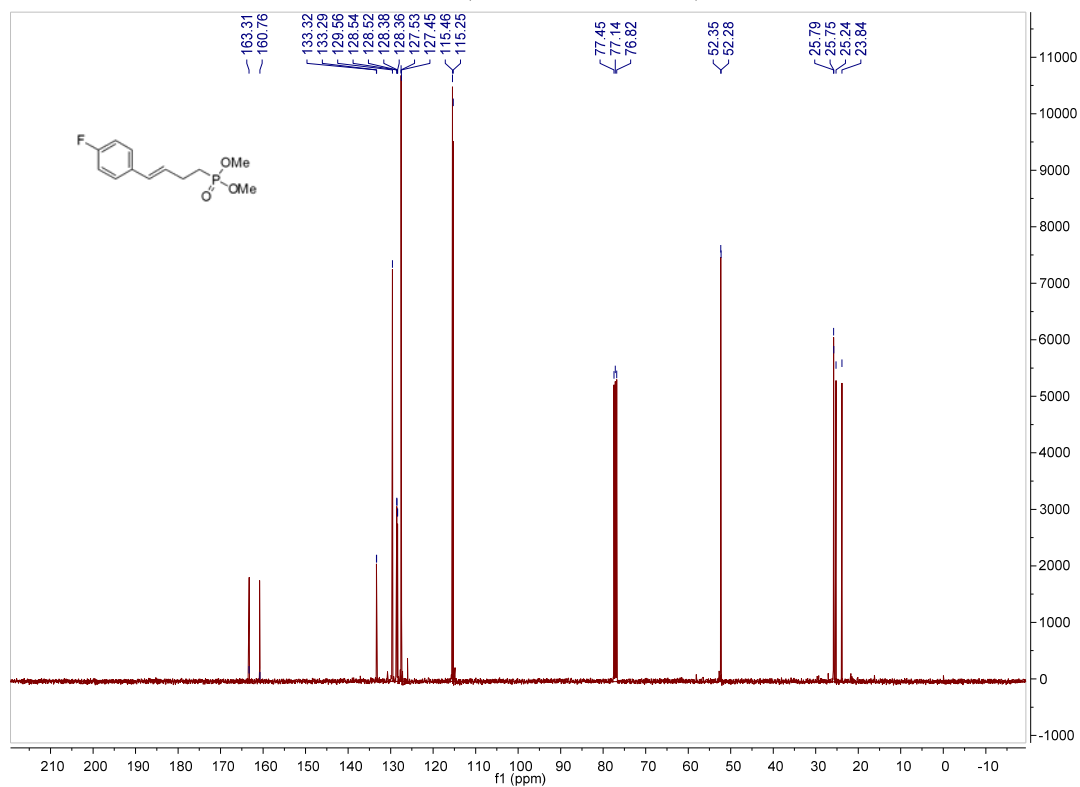

$^1\text{H}$  NMR (400 MHz,  $\text{CDCl}_3$ ) of **4f**

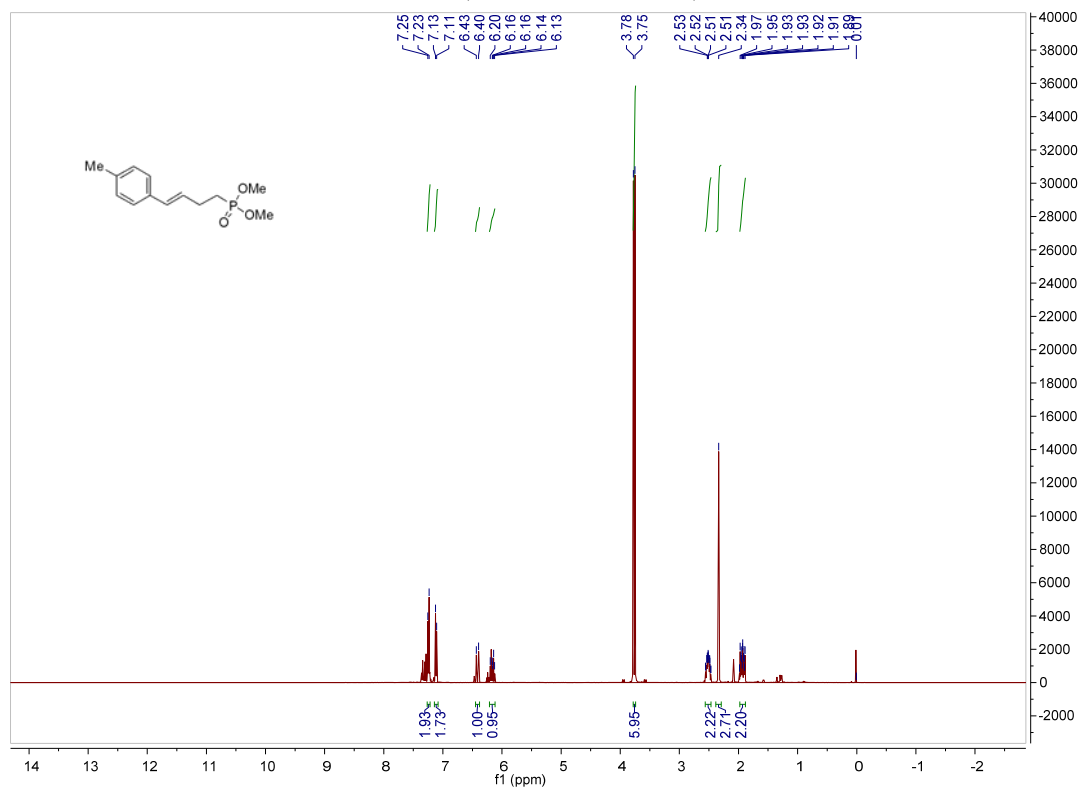

$^{31}\text{P}$  NMR (162 MHz,  $\text{CDCl}_3$ ) of **4f**

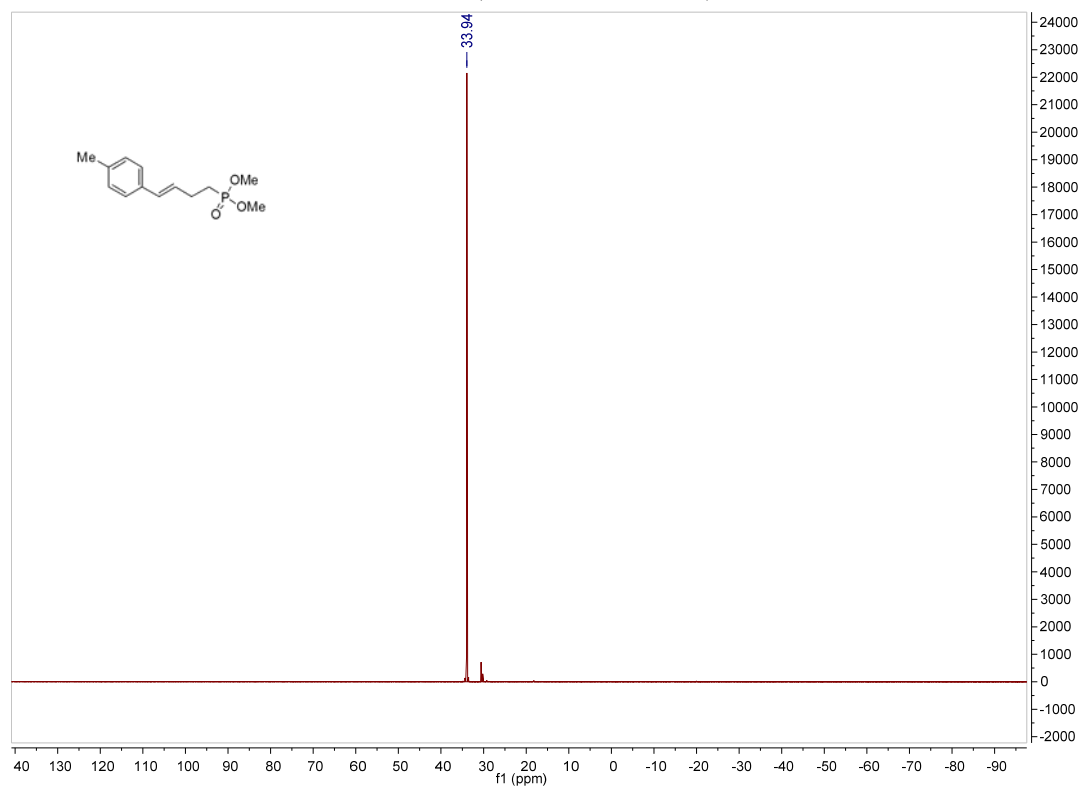

$^{13}\text{C}$  NMR (101 MHz,  $\text{CDCl}_3$ ) of **4f**

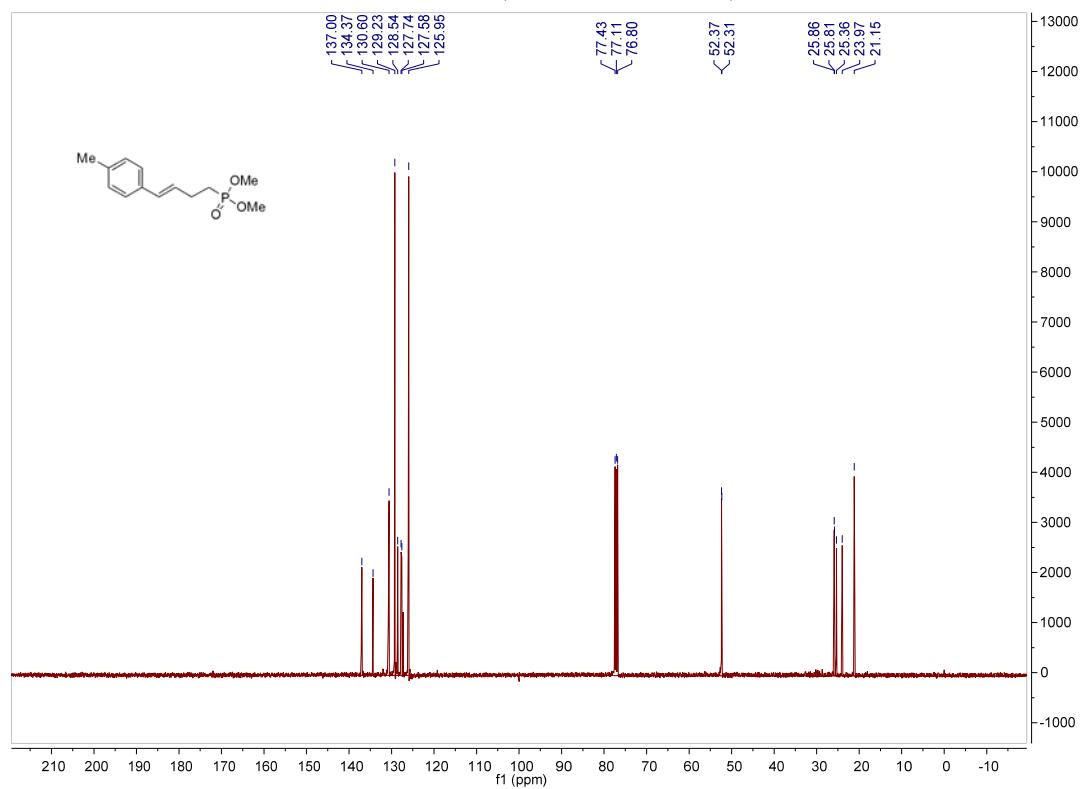

$^1\text{H}$  NMR (400 MHz,  $\text{CDCl}_3$ ) of **4g**

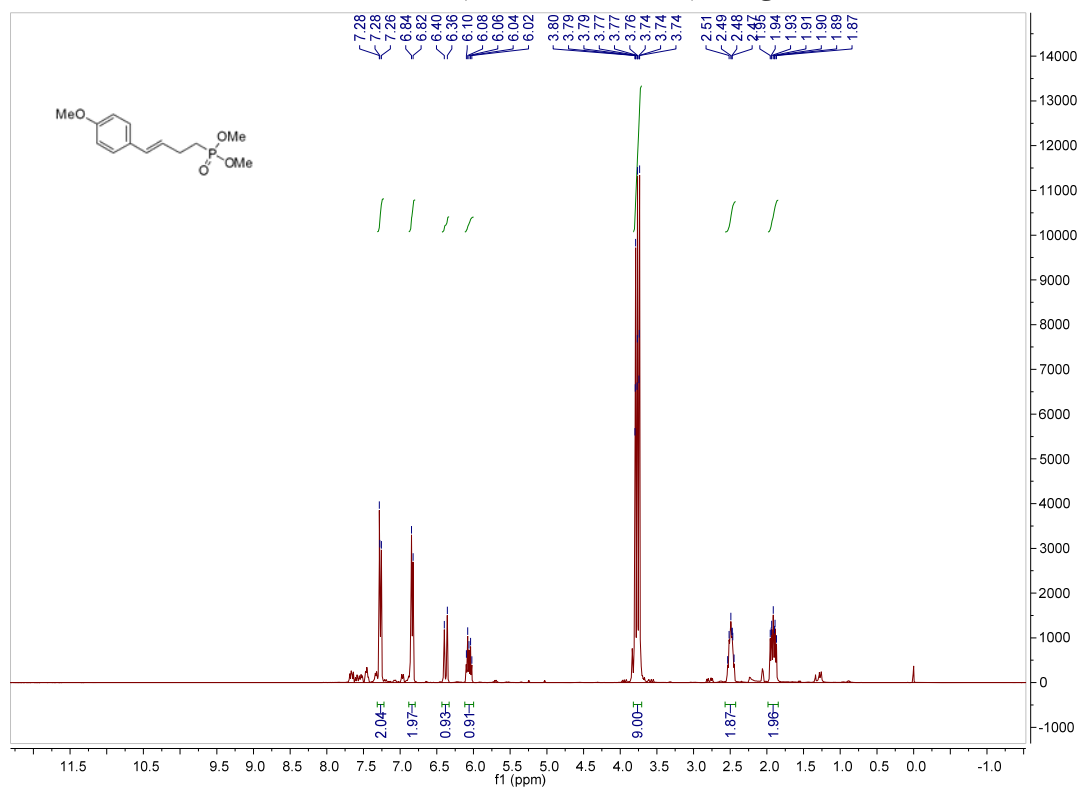

$^{31}\text{P}$  NMR (162 MHz,  $\text{CDCl}_3$ ) of **4g**

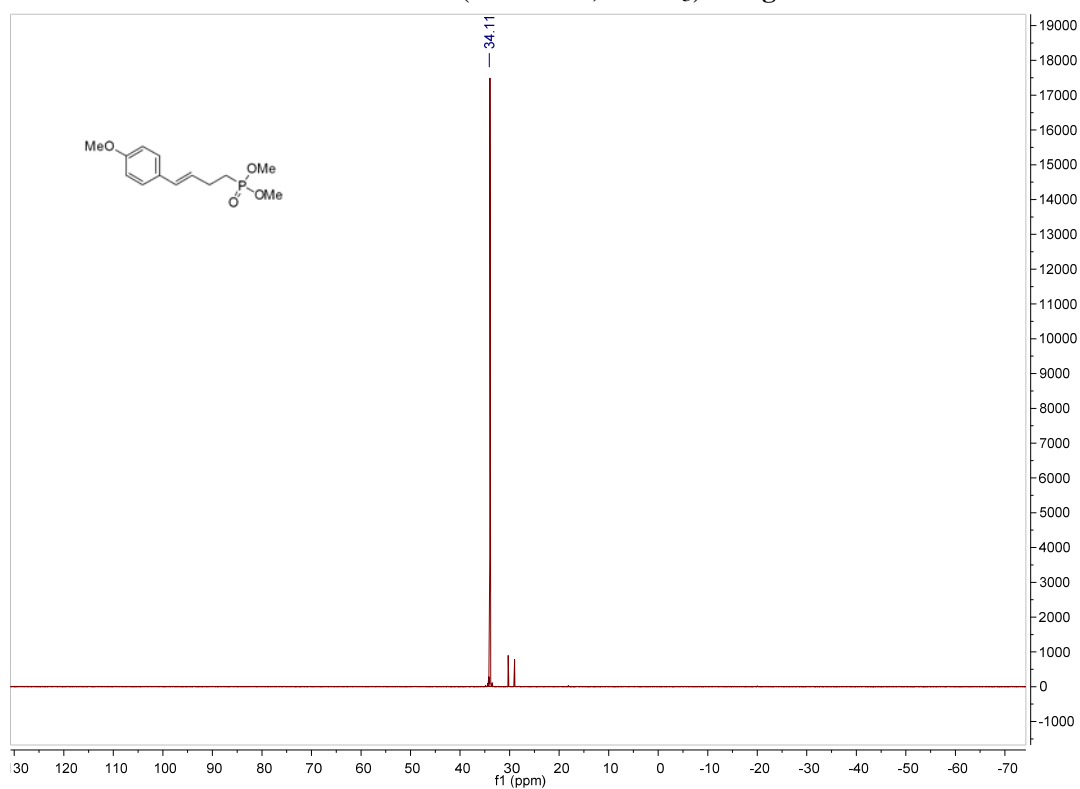

<sup>13</sup>C NMR (101 MHz, CDCl<sub>3</sub>) of **4g**

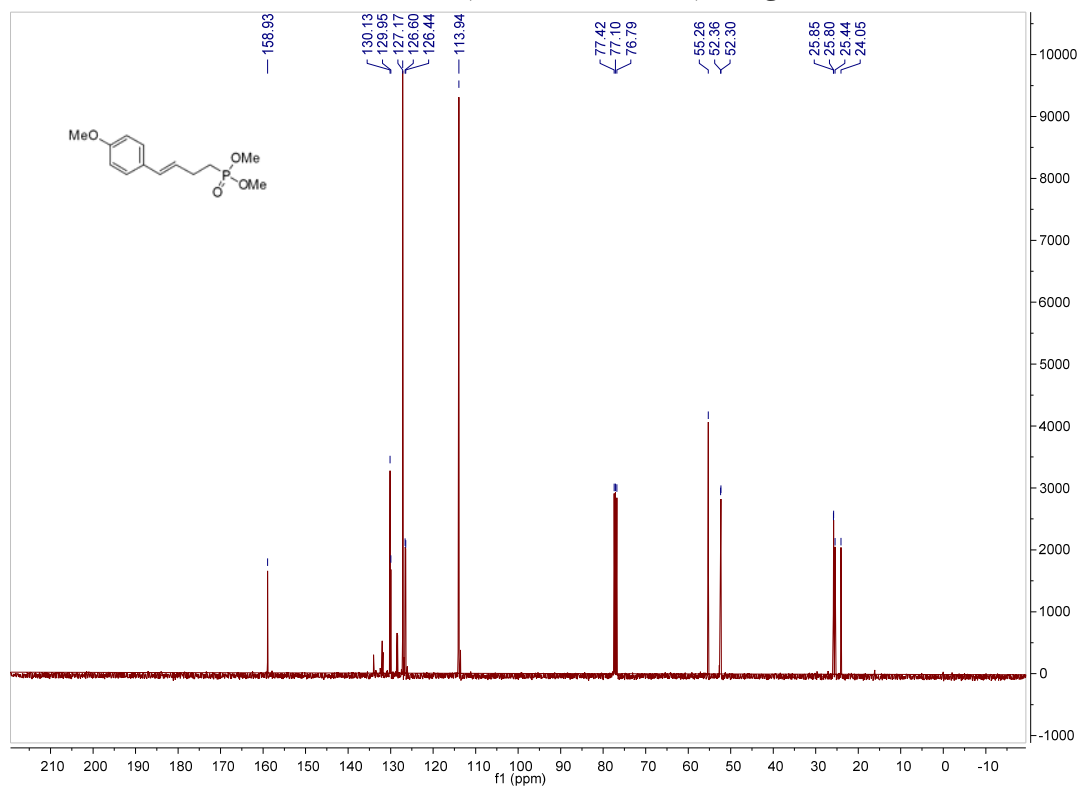

<sup>1</sup>H NMR (300 MHz, CDCl<sub>3</sub>) of **6aa**

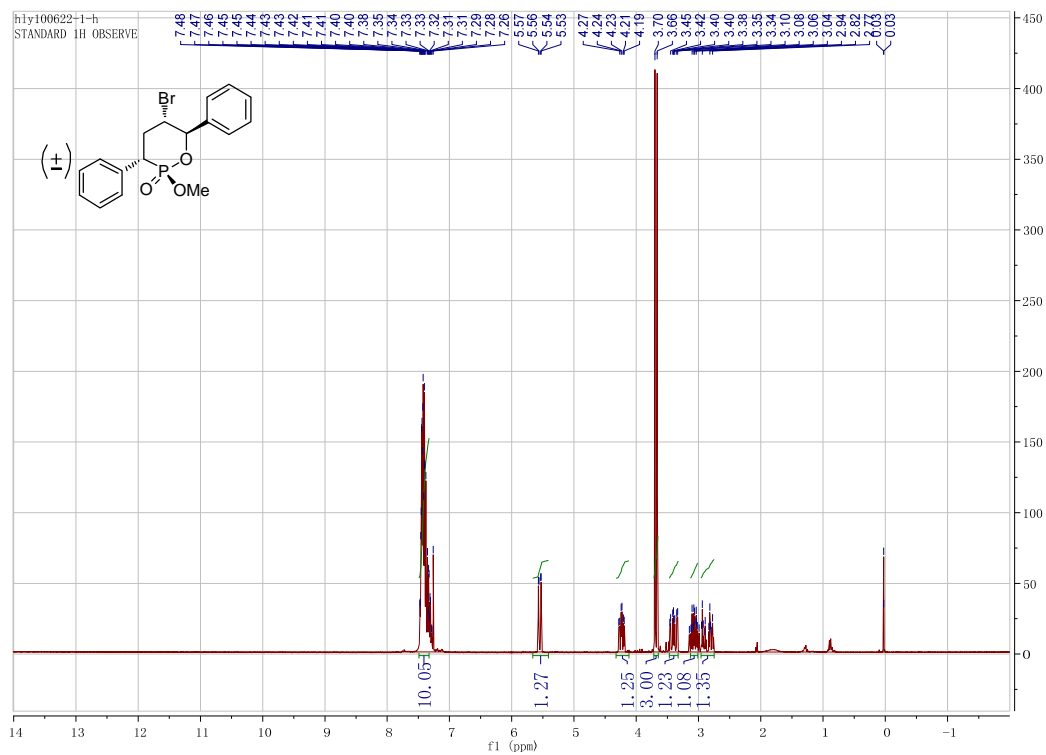

### $^{31}\text{P}$ NMR (121 MHz, $\text{CDCl}_3$ ) of **6aa**

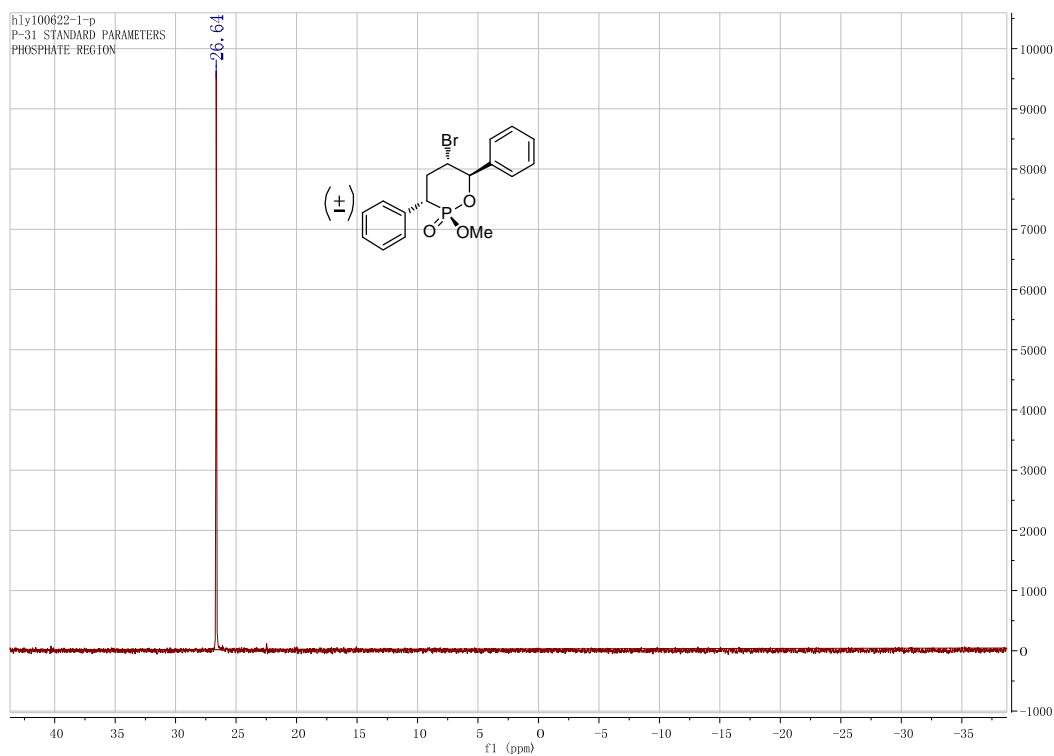

### $^{13}\text{C}$ NMR (75 MHz, $\text{CDCl}_3$ ) of **6aa**

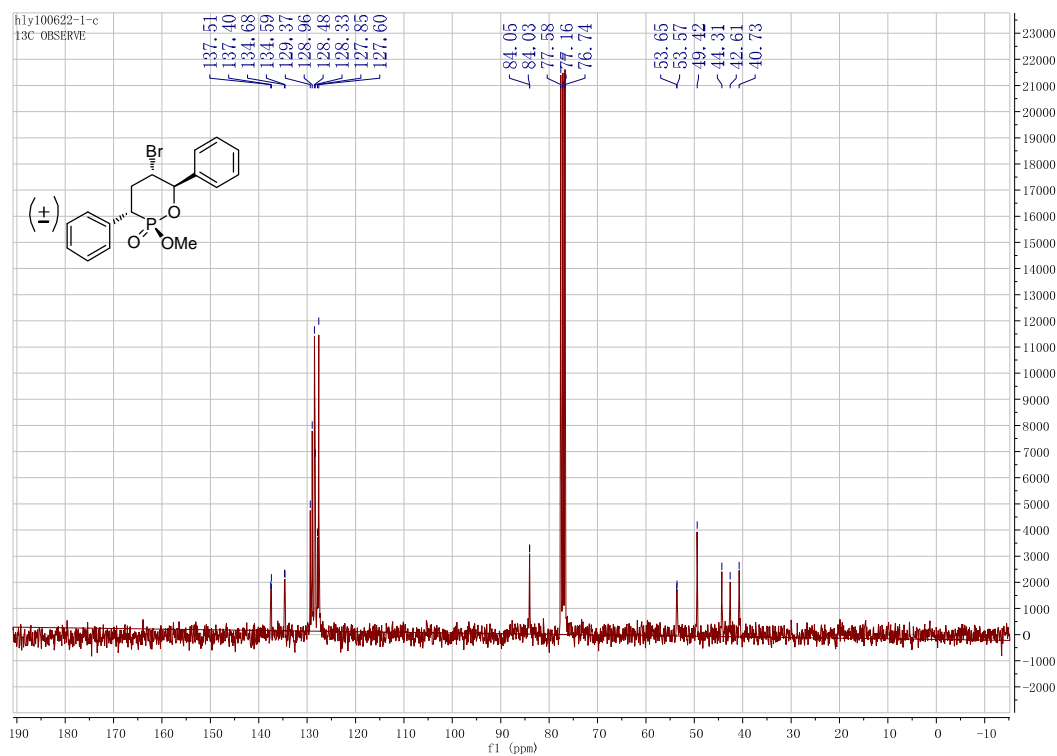

### $^1\text{H}$ NMR (300 MHz, $\text{CDCl}_3$ ) of **6ab**

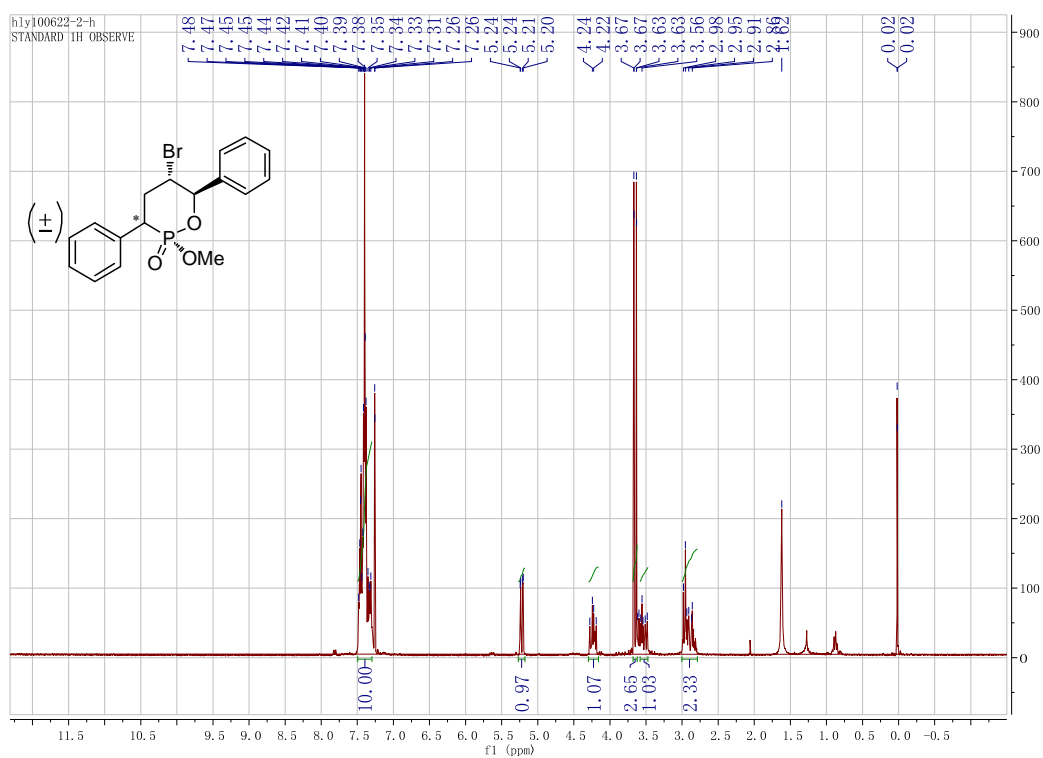

### $^{31}\text{P}$ NMR (121 MHz, $\text{CDCl}_3$ ) of **6ab**

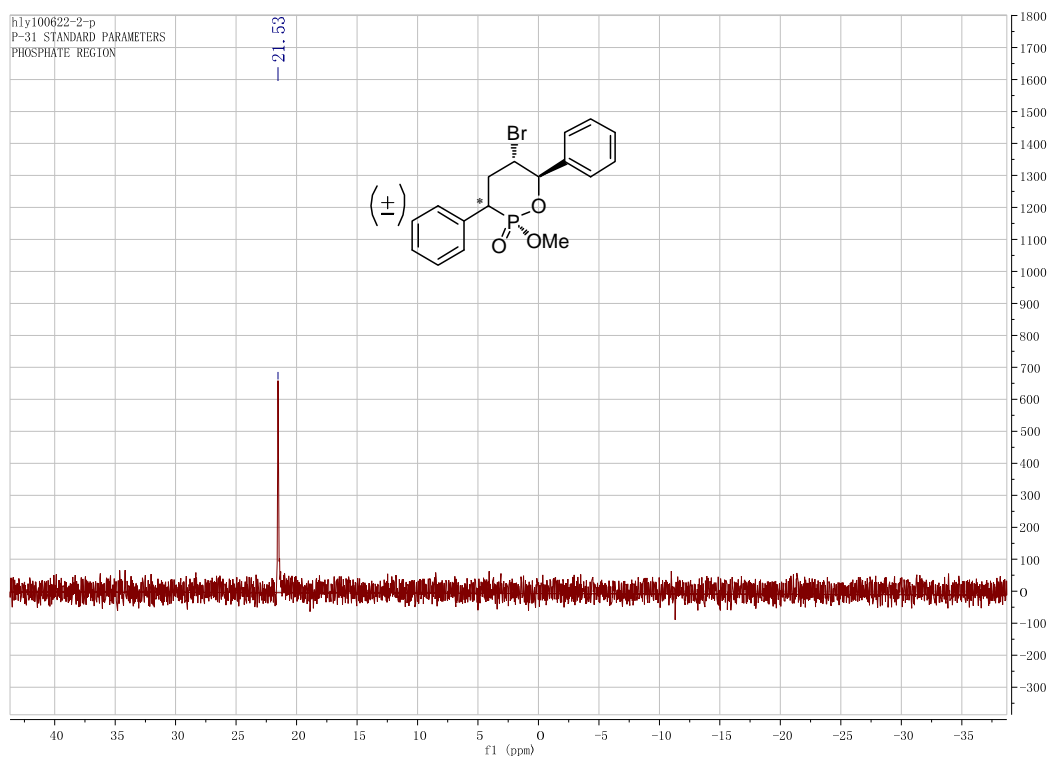

$^{13}\text{C}$  NMR (75 MHz,  $\text{CDCl}_3$ ) of **6ab**

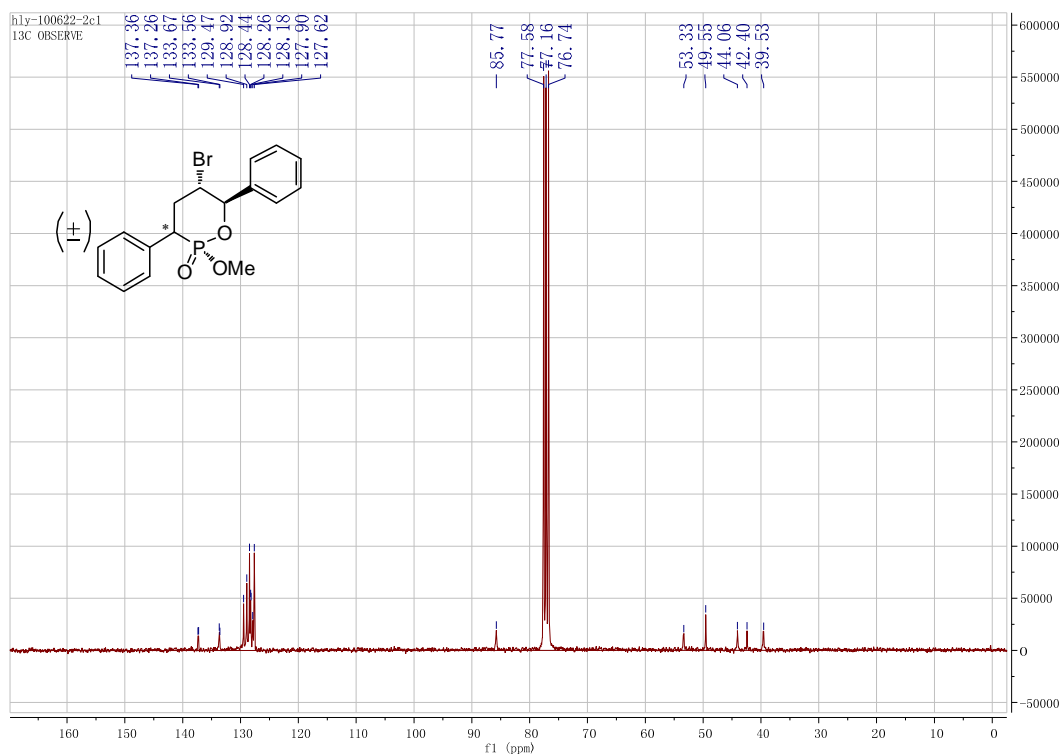

$^1\text{H}$  NMR (400 MHz,  $\text{CDCl}_3$ ) of **6ba**

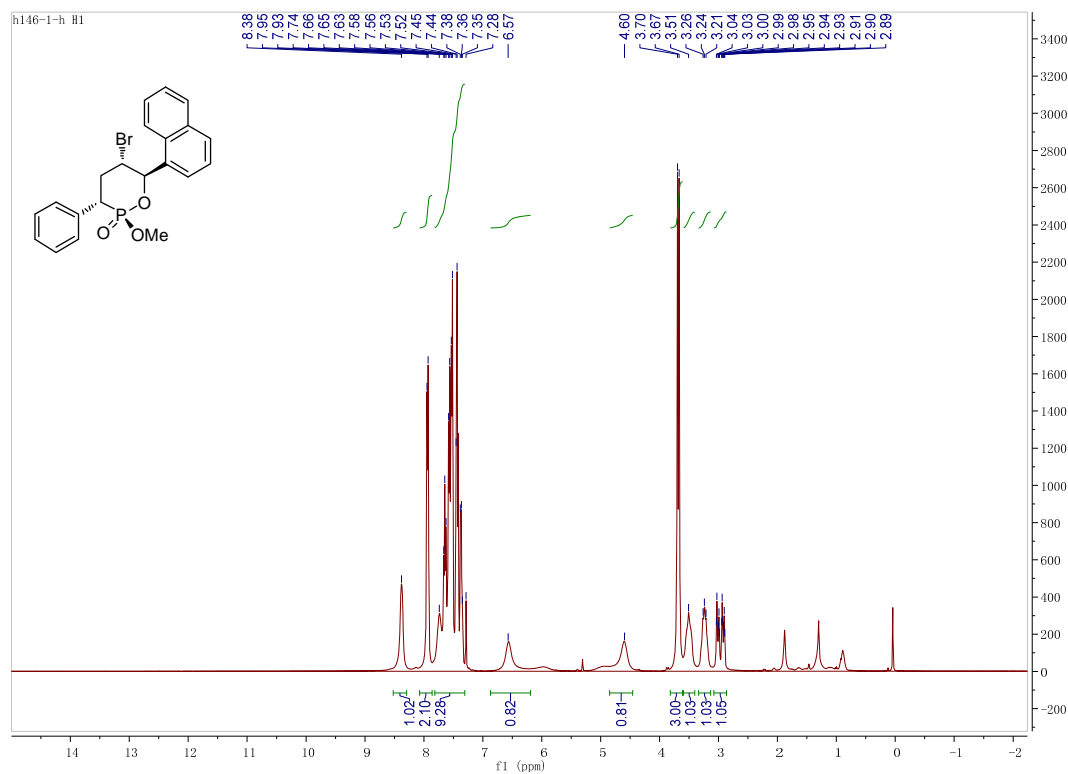

$^{31}\text{P}$  NMR (162 MHz,  $\text{CDCl}_3$ ) of **6ba**

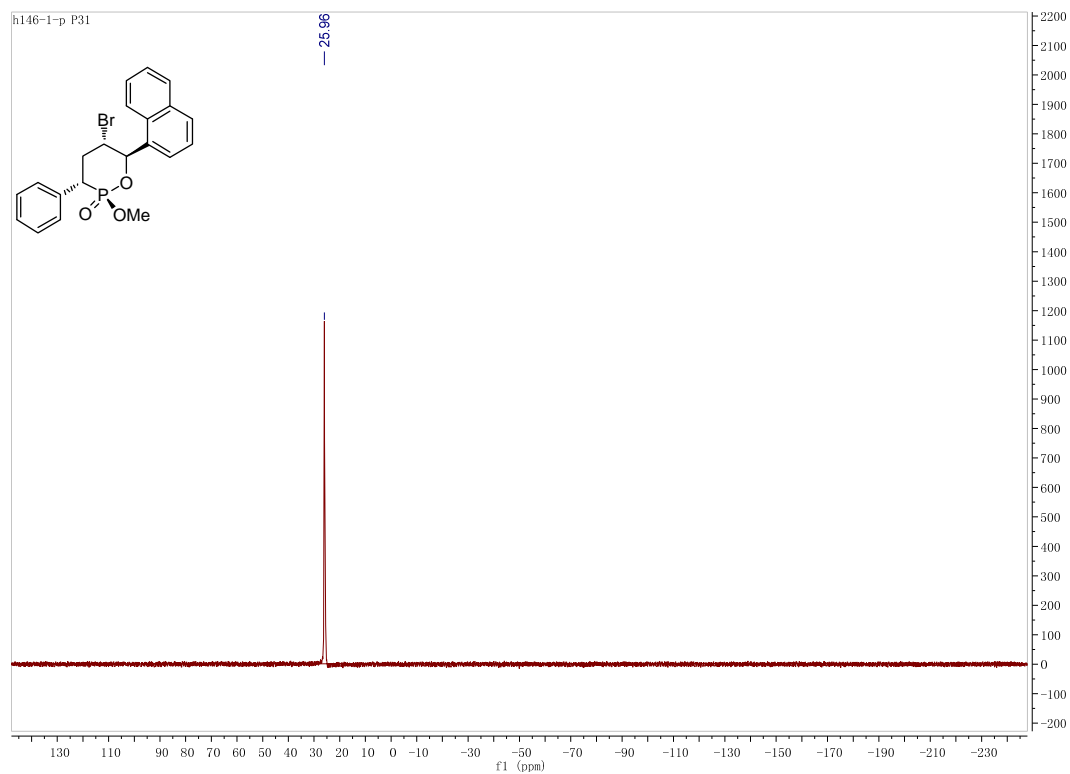

$^{13}\text{C}$  NMR (101 MHz,  $\text{CDCl}_3$ ) of **6ba**

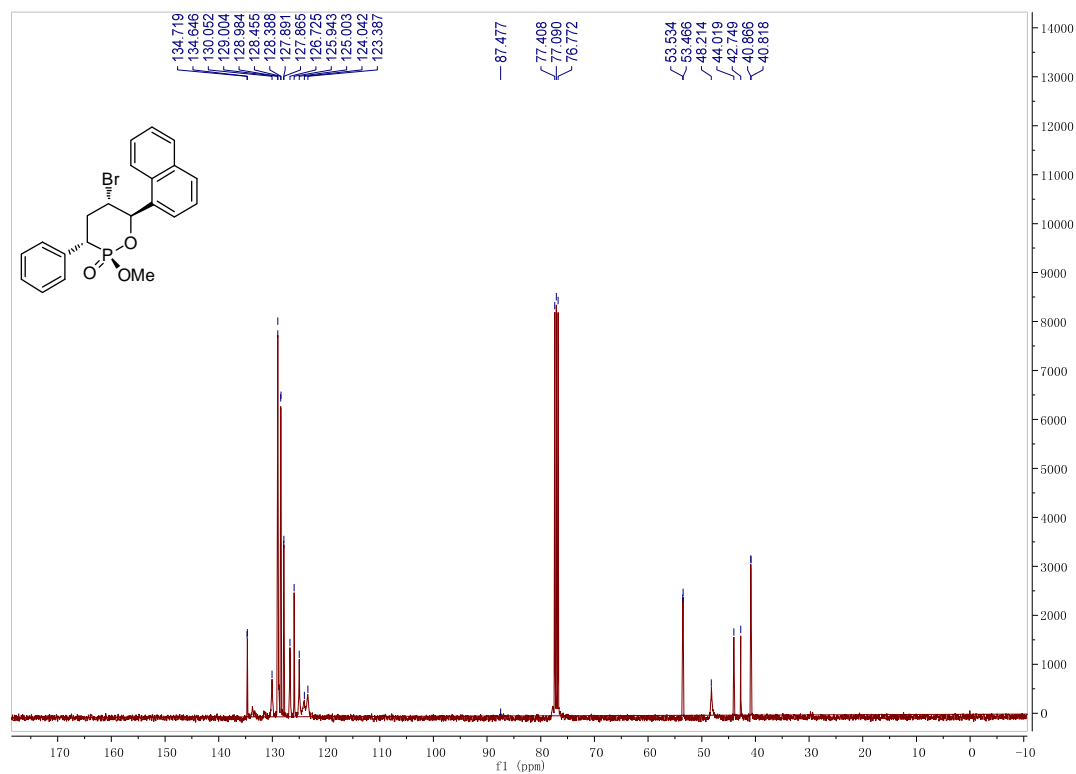



<sup>1</sup>H NMR (400 MHz, CDCl<sub>3</sub>) of **6ca**

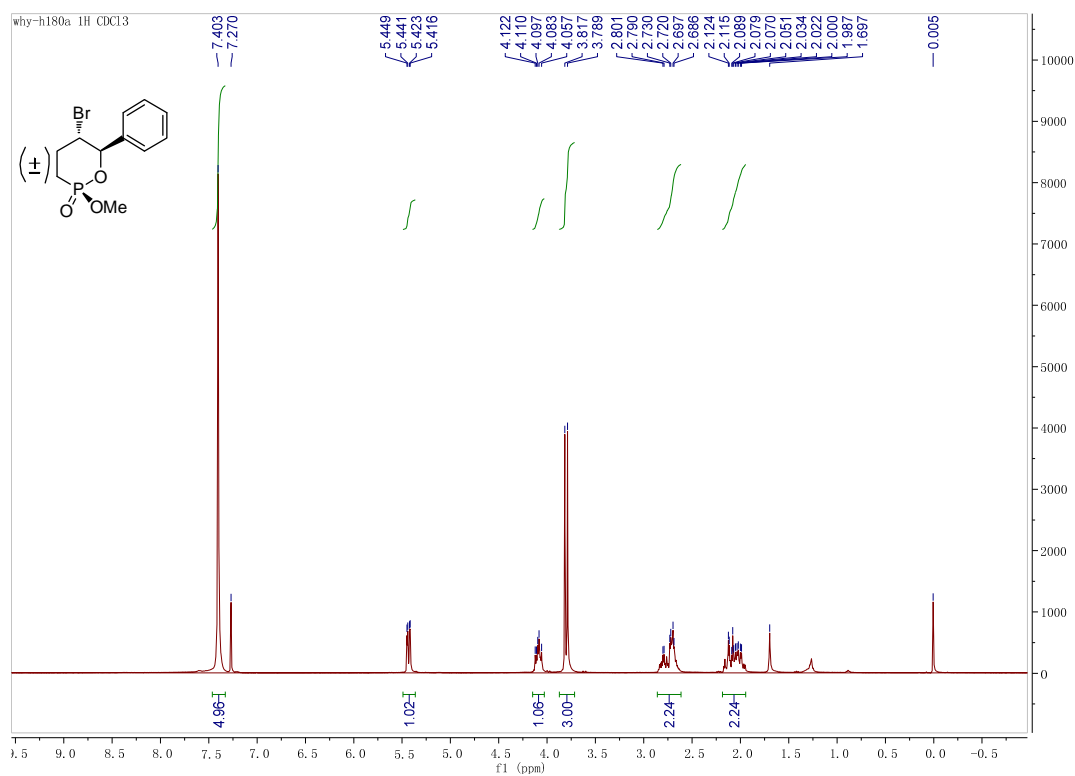

<sup>31</sup>P NMR (162 MHz, CDCl<sub>3</sub>) of **6ca**

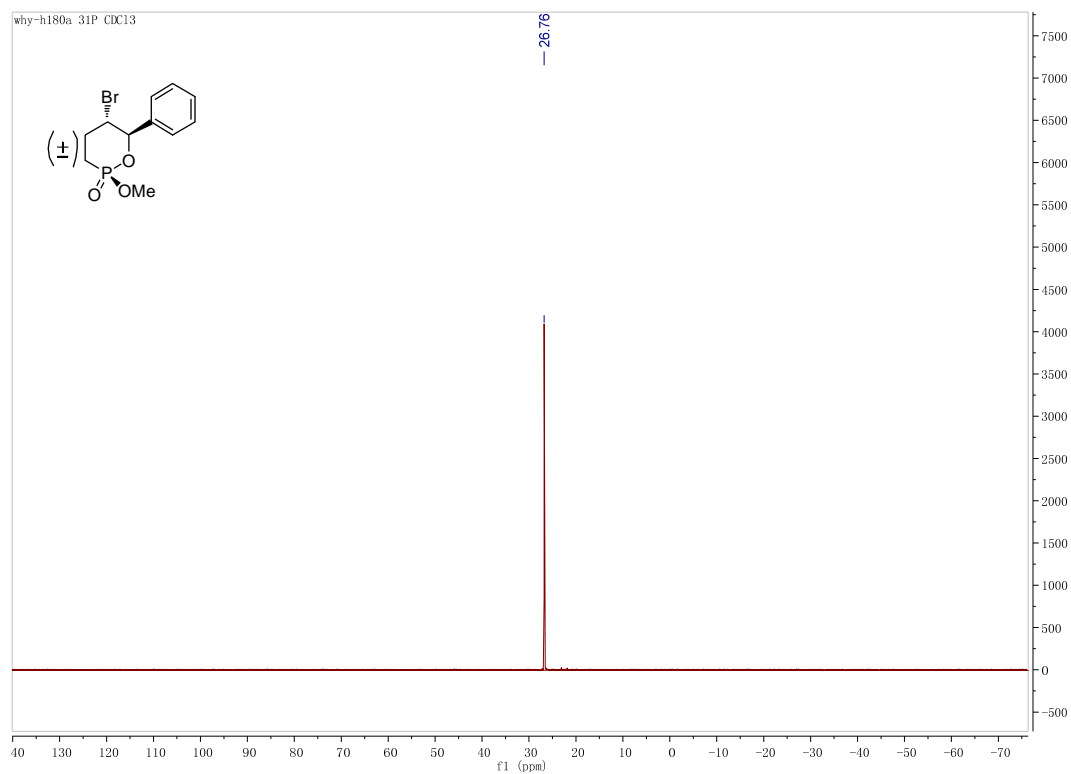

<sup>13</sup>C NMR (101 MHz, CDCl<sub>3</sub>) of **6ca**

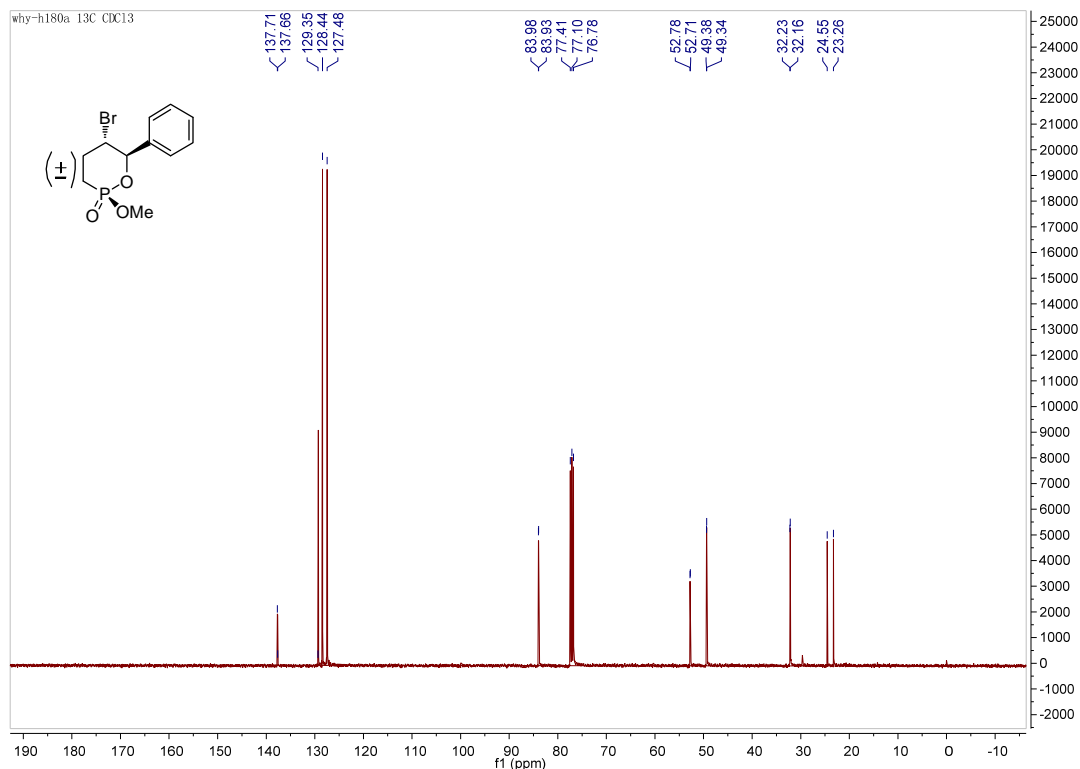

<sup>1</sup>H NMR (400 MHz, CDCl<sub>3</sub>) of **6cb**

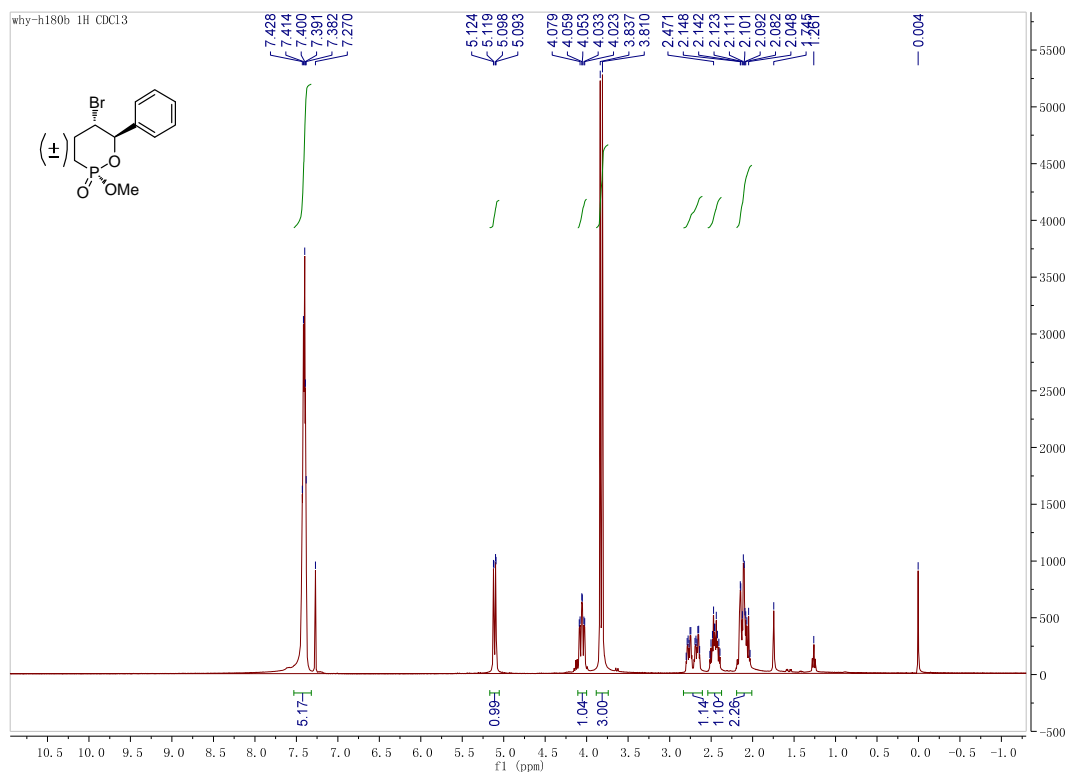

<sup>31</sup>P NMR (162 MHz, CDCl<sub>3</sub>) of **6cb**

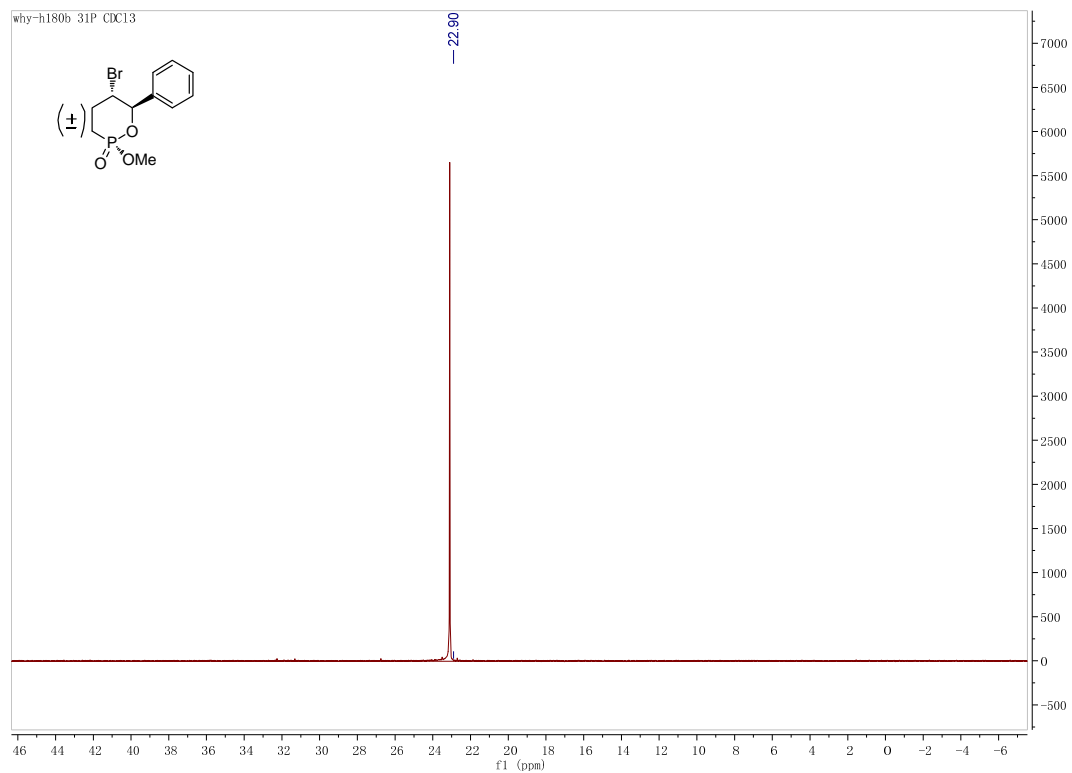

<sup>13</sup>C NMR (101 MHz, CDCl<sub>3</sub>) of **6cb**

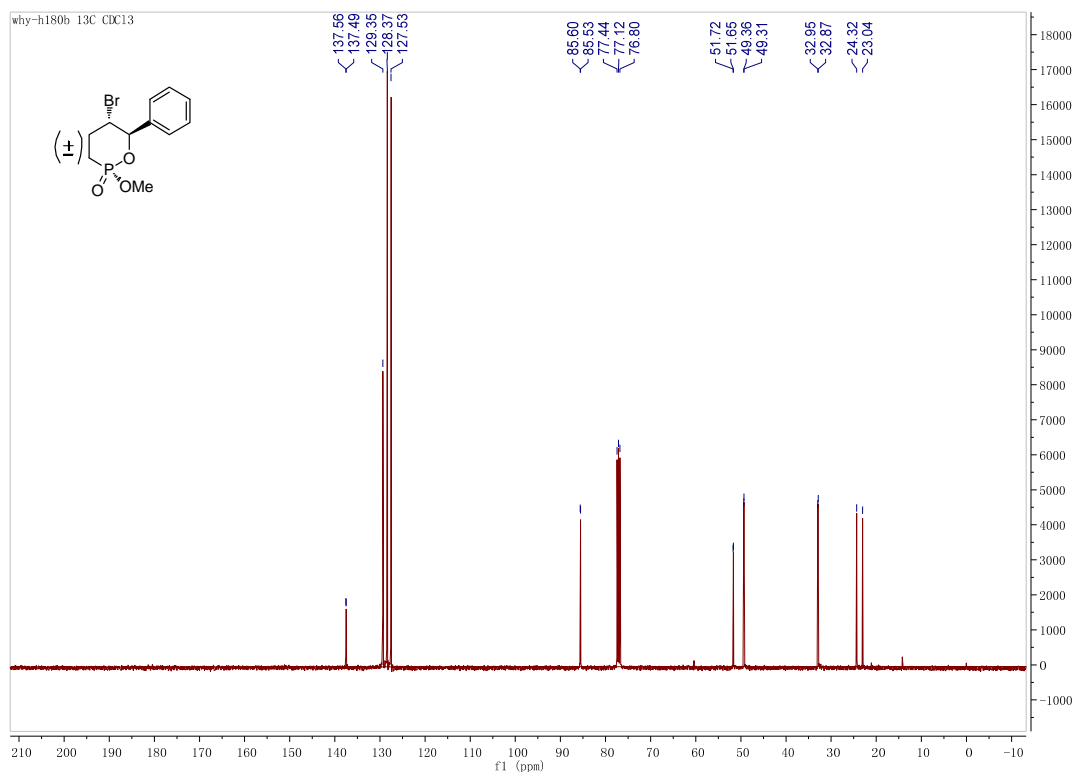

### $^1\text{H}$ NMR (400 MHz, $\text{CDCl}_3$ ) of **6da**

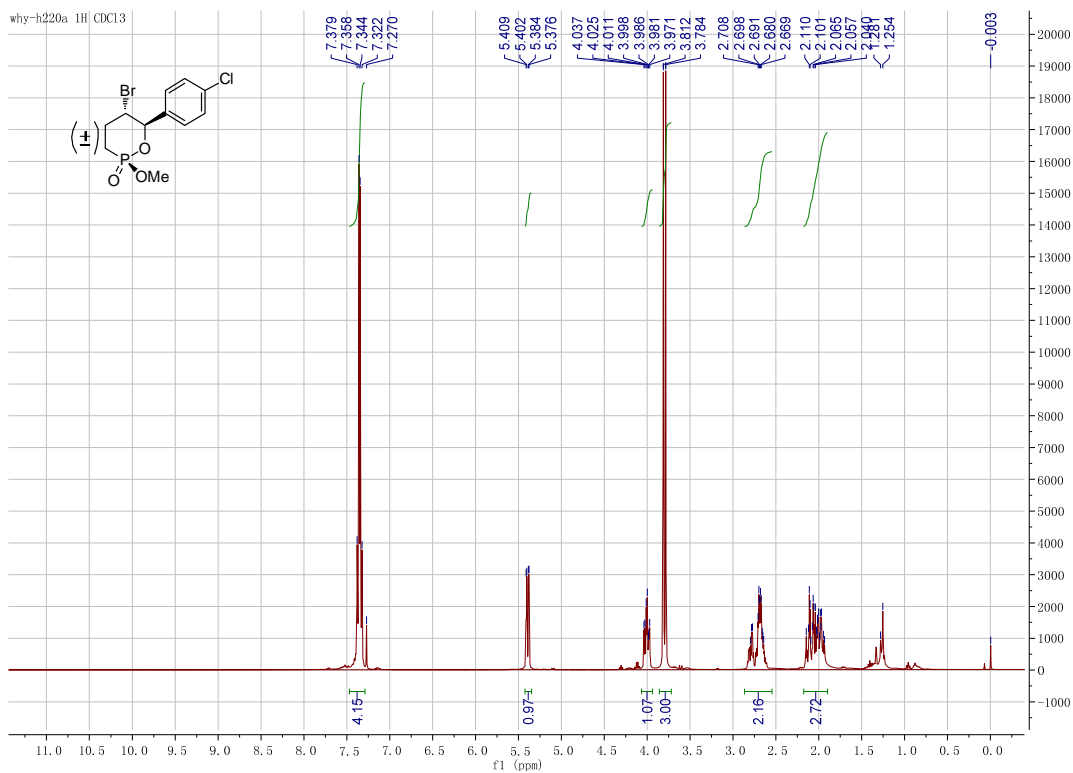

### $^{31}\text{P}$ NMR (162 MHz, $\text{CDCl}_3$ ) of **6da**

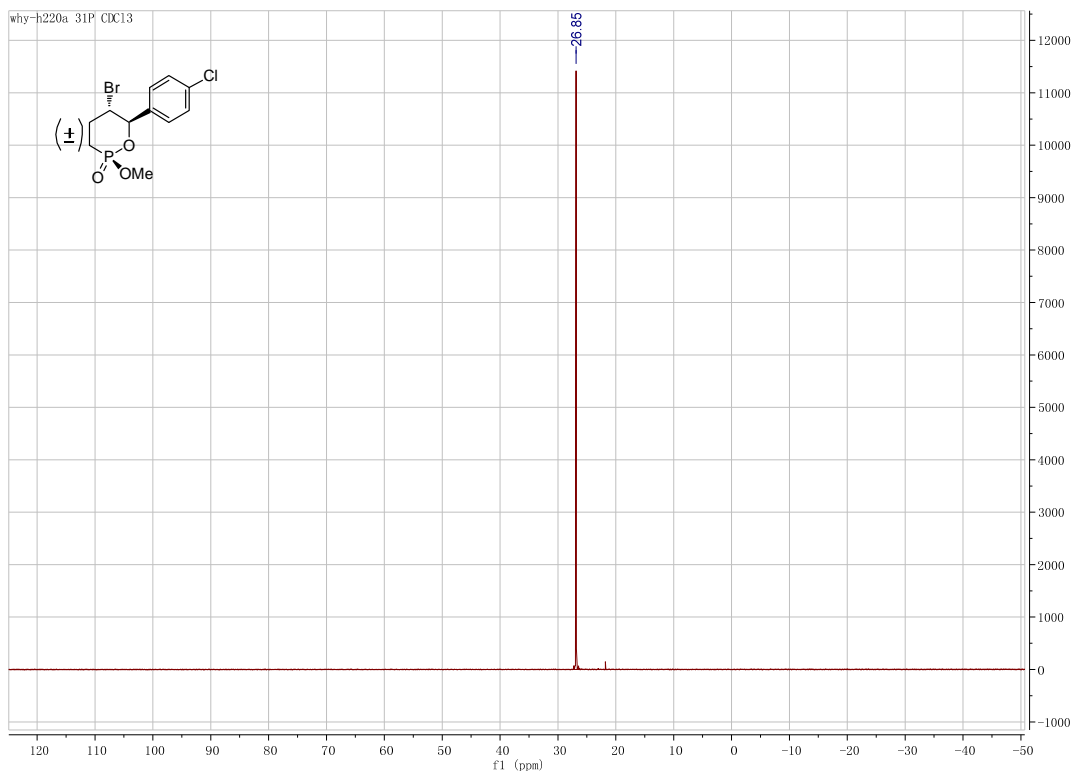

### <sup>13</sup>C NMR (101 MHz, CDCl<sub>3</sub>) of **6da**

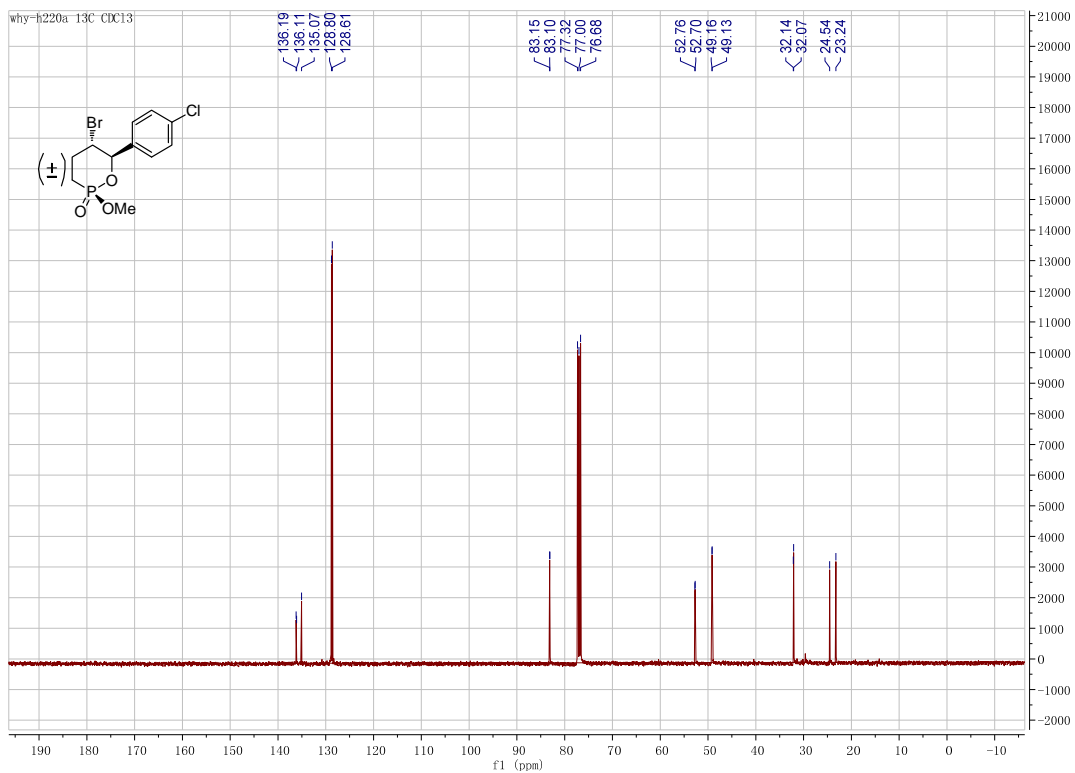

### <sup>1</sup>H NMR (400 MHz, CDCl<sub>3</sub>) of **6db**

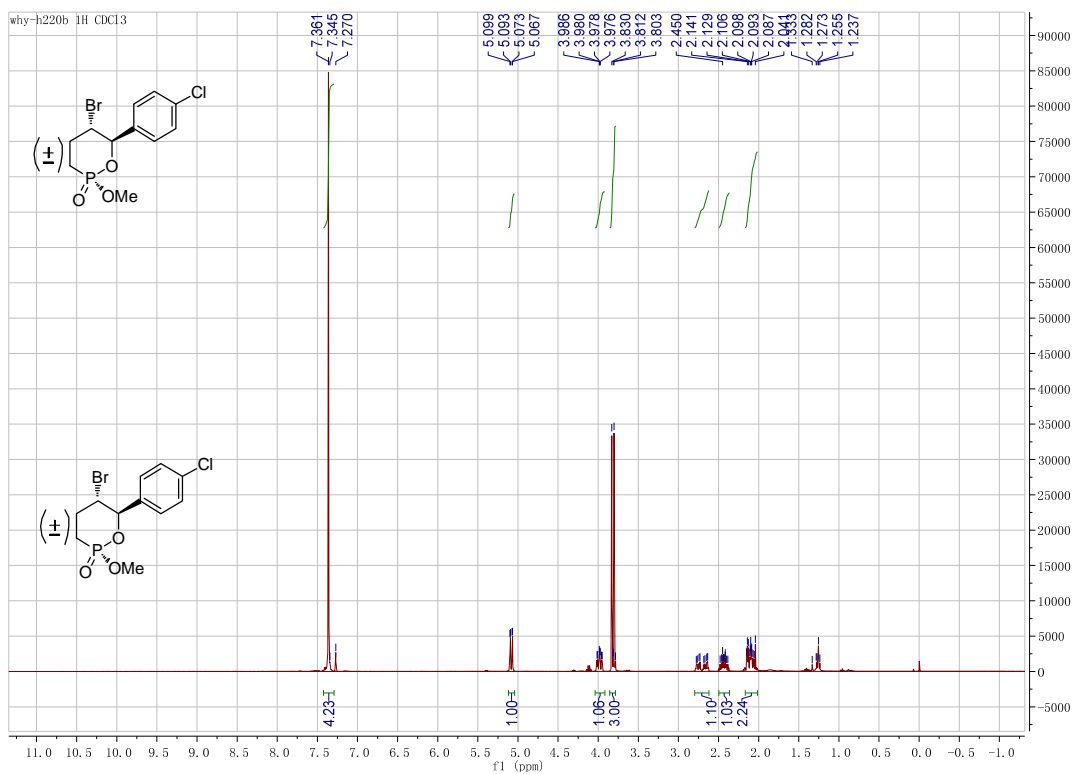

$^{31}\text{P}$  NMR (162 MHz,  $\text{CDCl}_3$ ) of **6db**

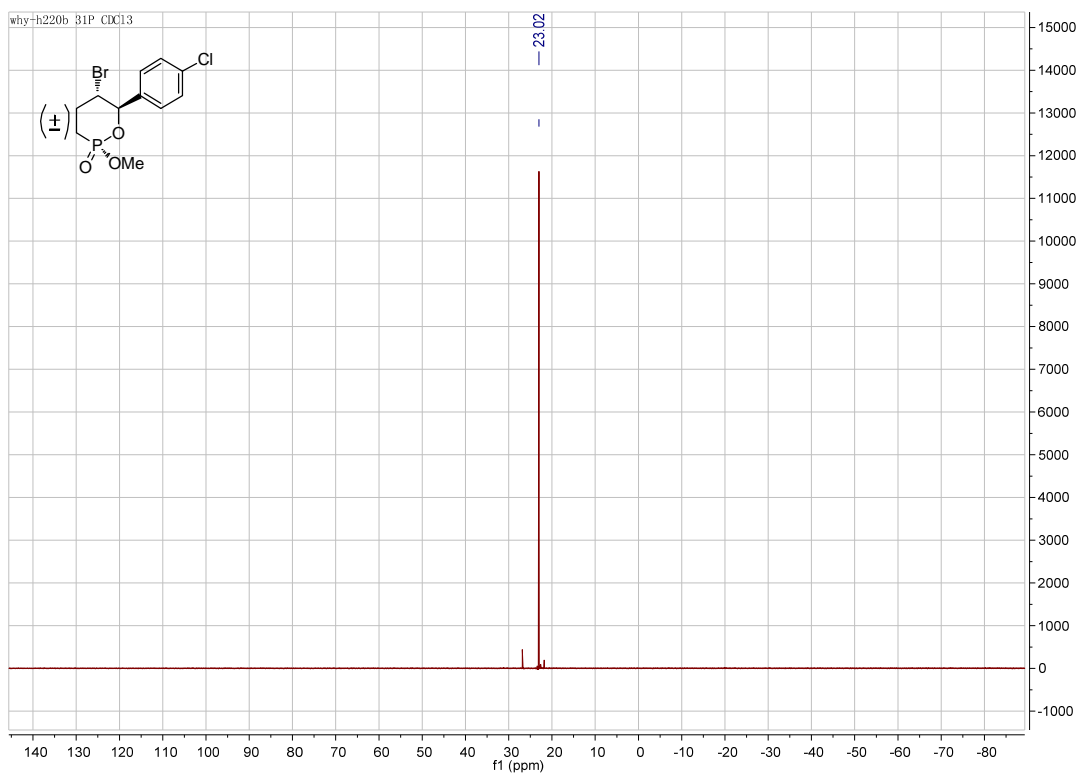

$^{13}\text{C}$  NMR (101 MHz,  $\text{CDCl}_3$ ) of **6db**

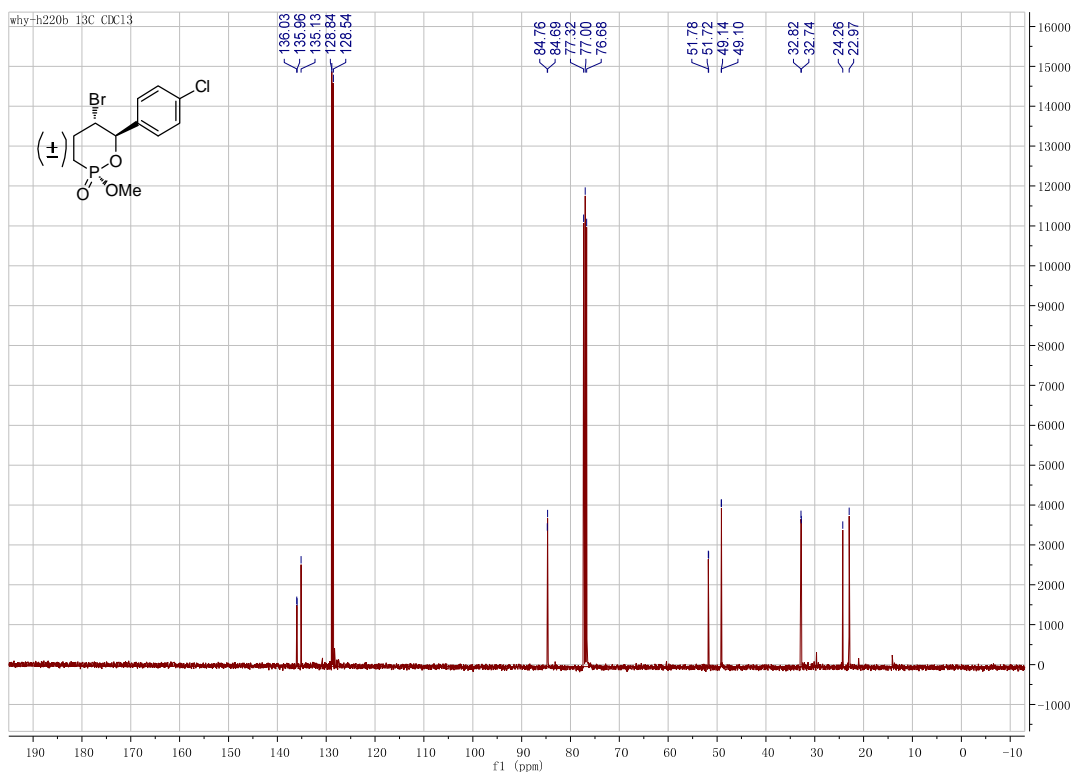

### $^1\text{H}$ NMR (400 MHz, $\text{CDCl}_3$ ) of **6ea**

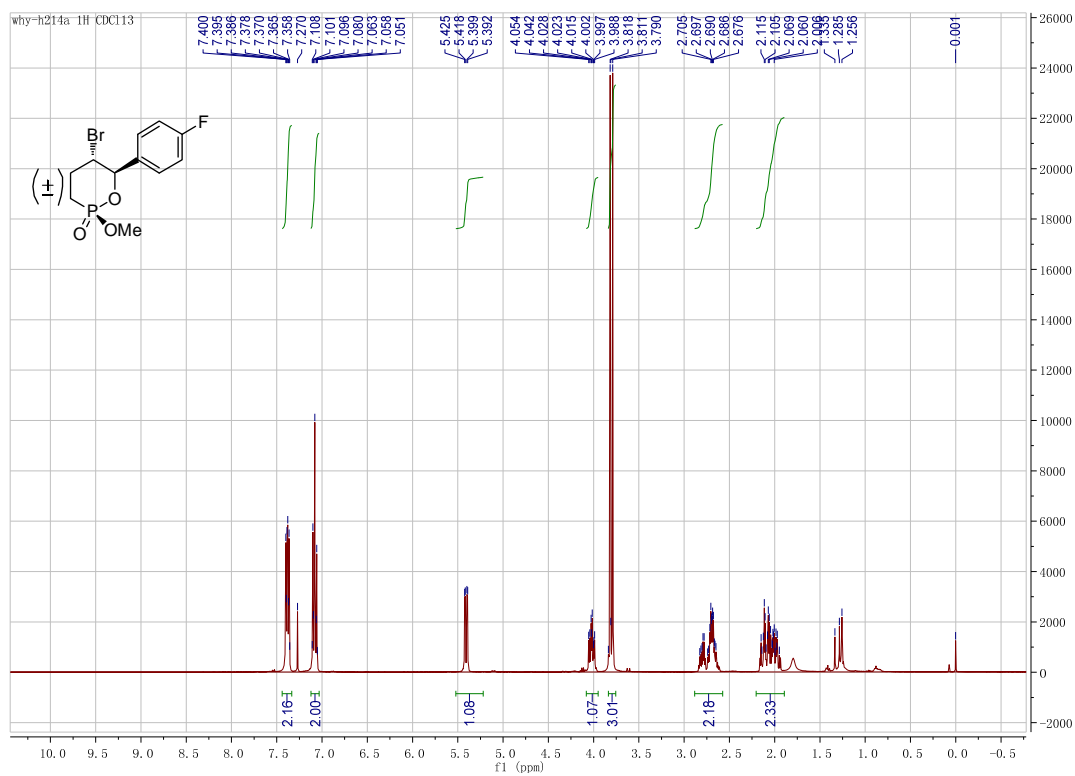

### $^{31}\text{P}$ NMR (162 MHz, $\text{CDCl}_3$ ) of **6ea**

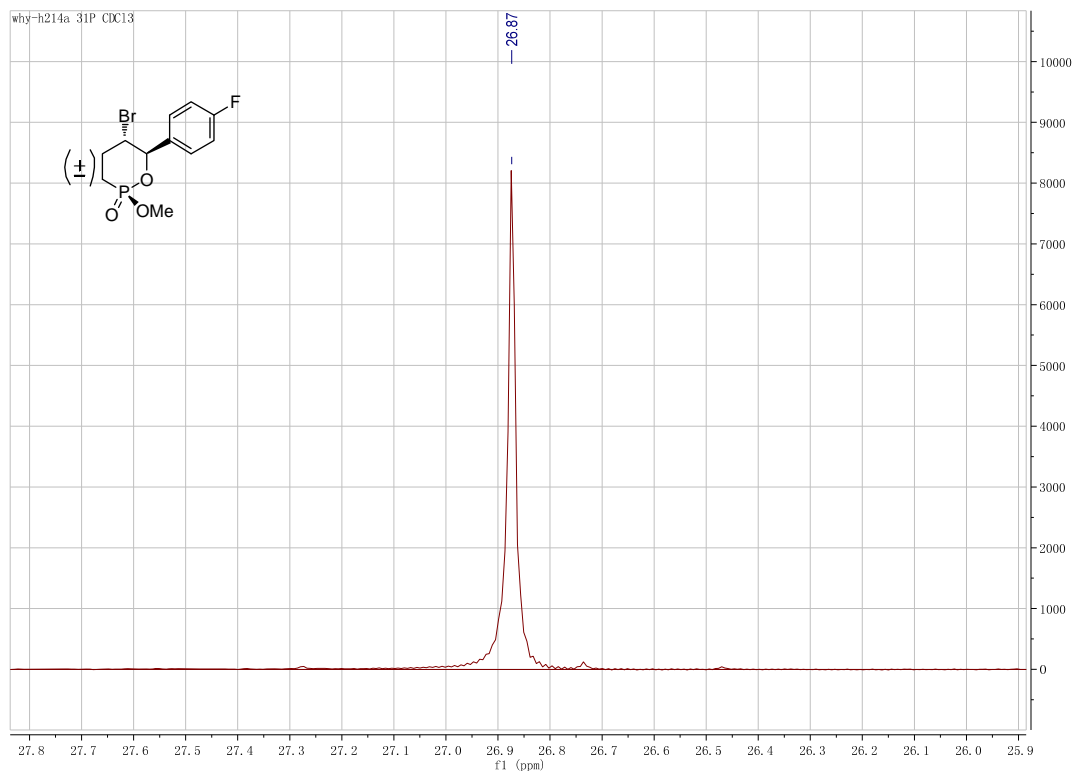

<sup>13</sup>C NMR (101 MHz, CDCl<sub>3</sub>) of **6ea**

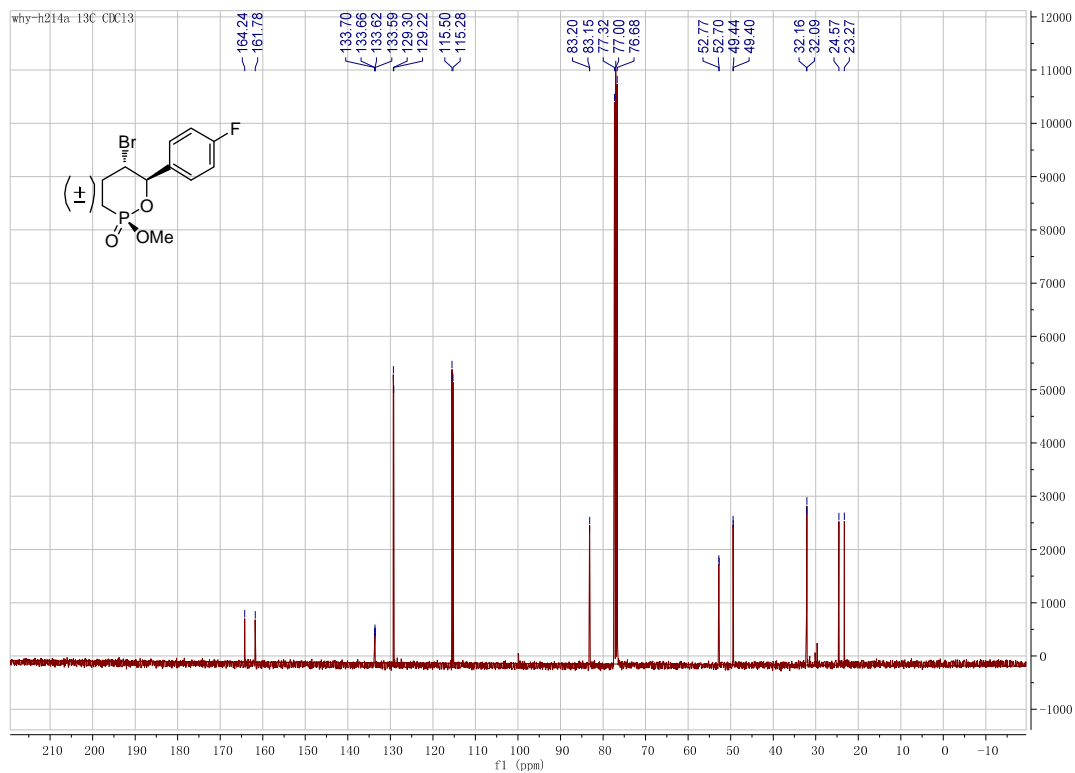

<sup>1</sup>H NMR (400 MHz, CDCl<sub>3</sub>) of **6eb**

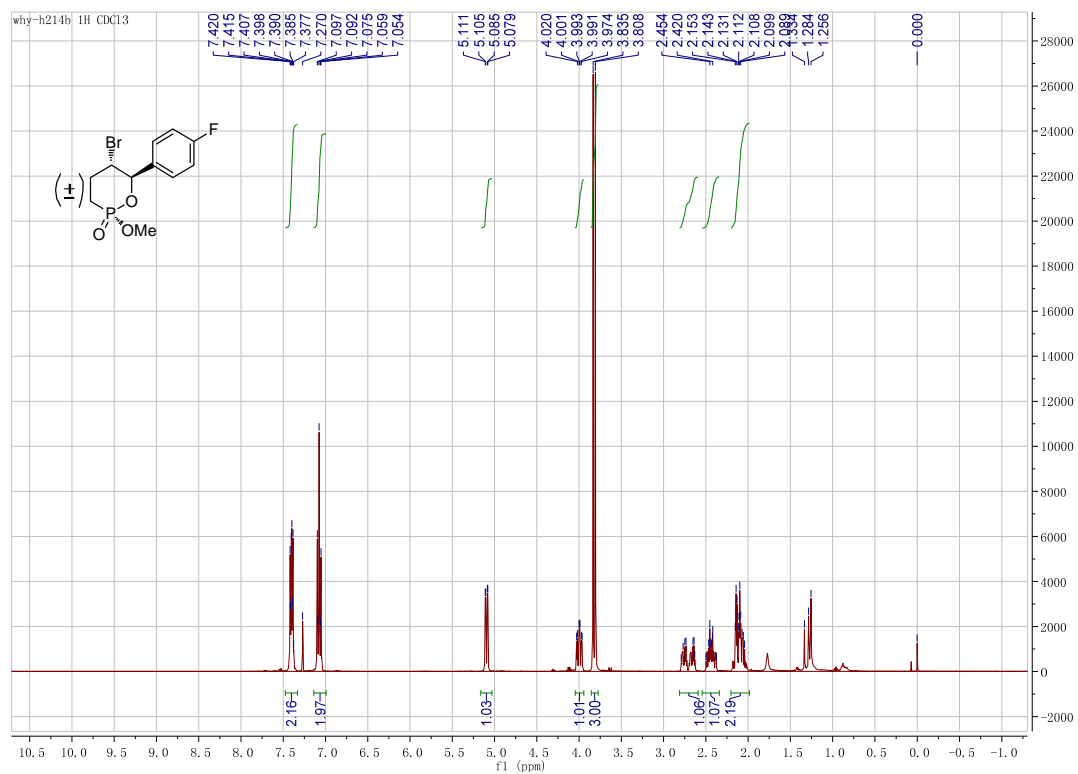



### <sup>31</sup>P NMR (162 MHz, CDCl<sub>3</sub>) of **6eb**

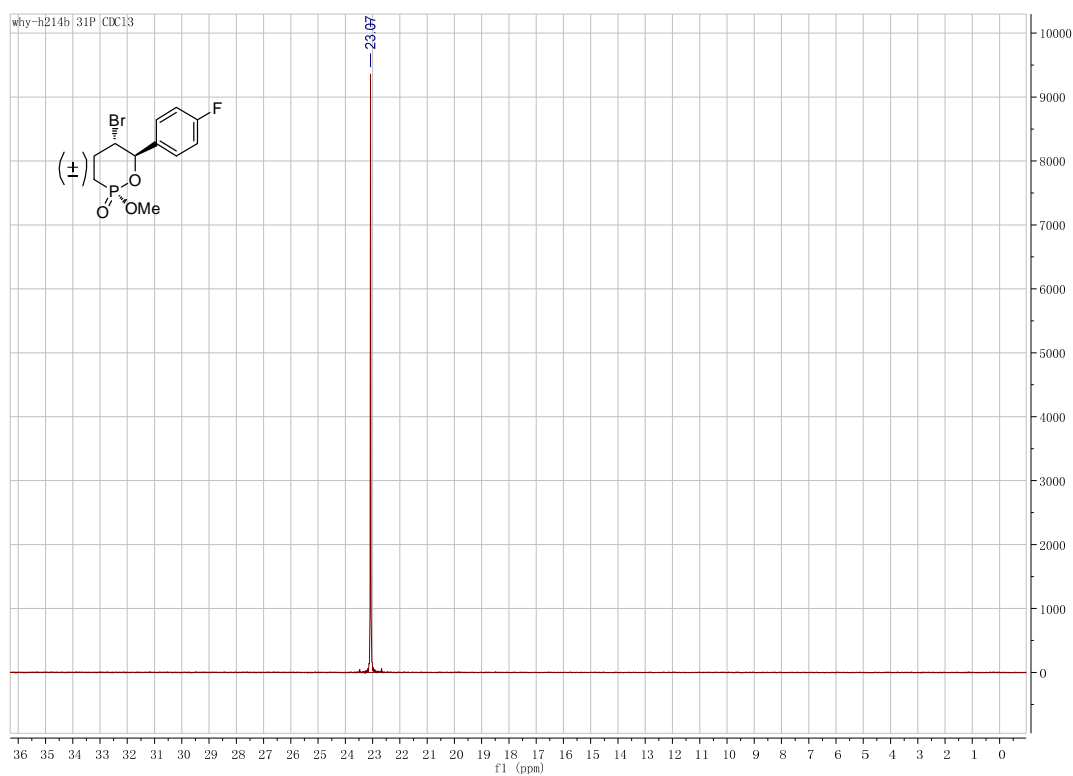

### <sup>13</sup>C NMR (101 MHz, CDCl<sub>3</sub>) of **6eb**

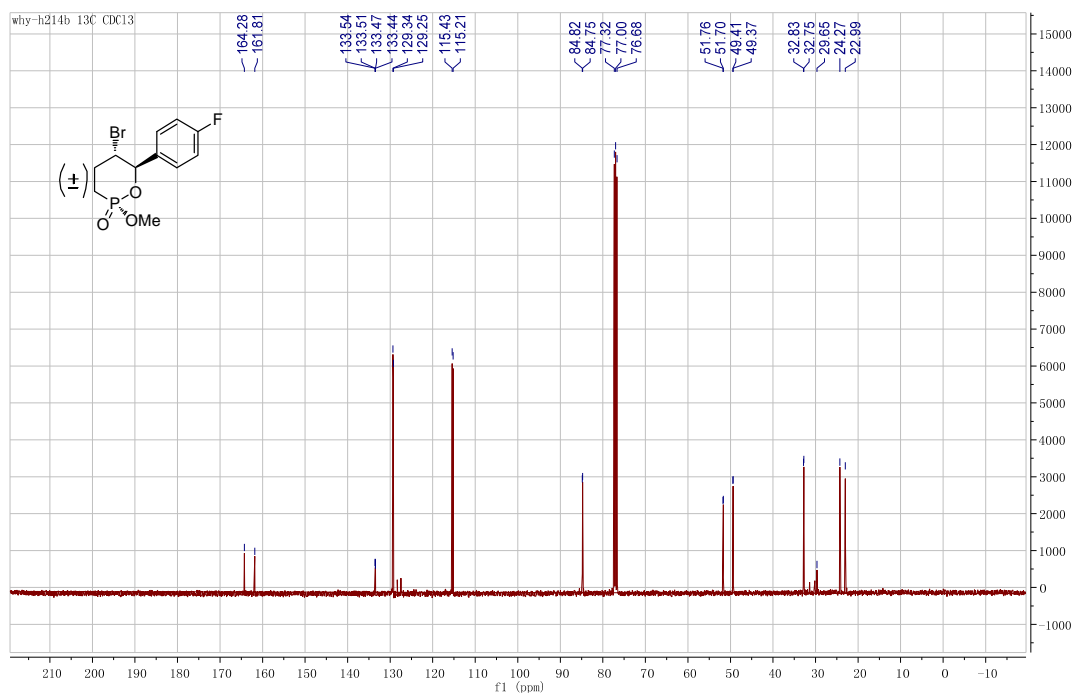

$^1\text{H}$  NMR (400 MHz,  $\text{CDCl}_3$ ) of **6fa**

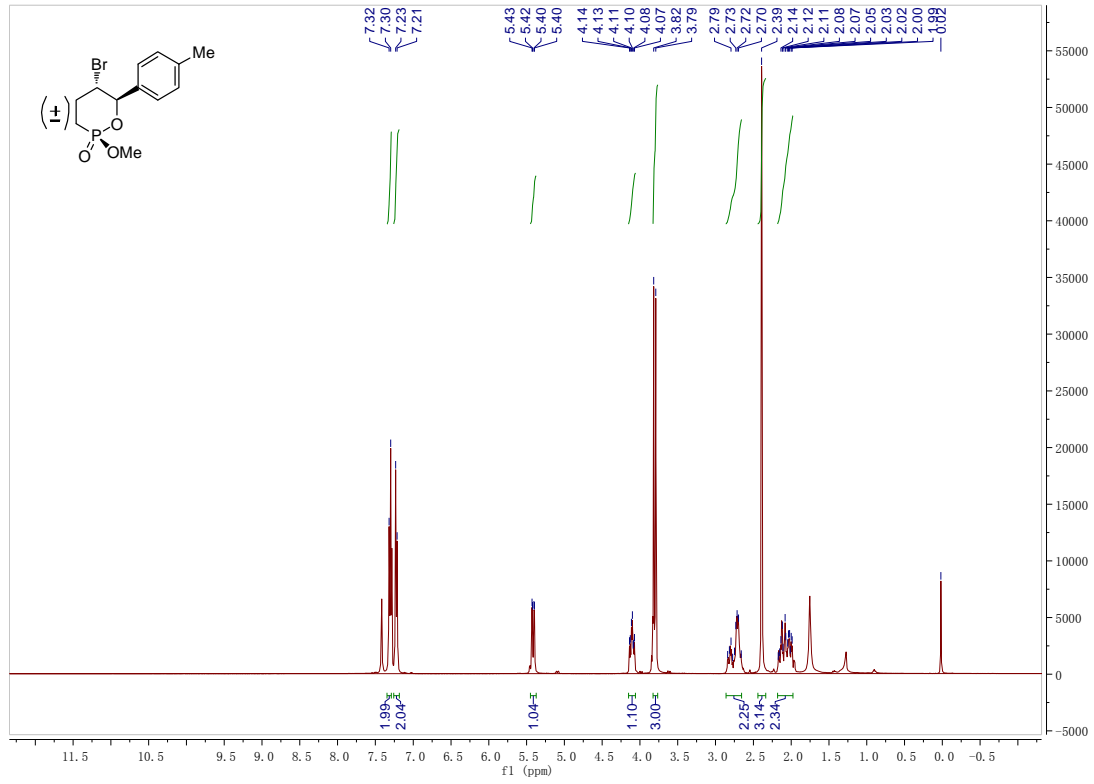

$^{31}\text{P}$  NMR (162 MHz,  $\text{CDCl}_3$ ) of **6fa**

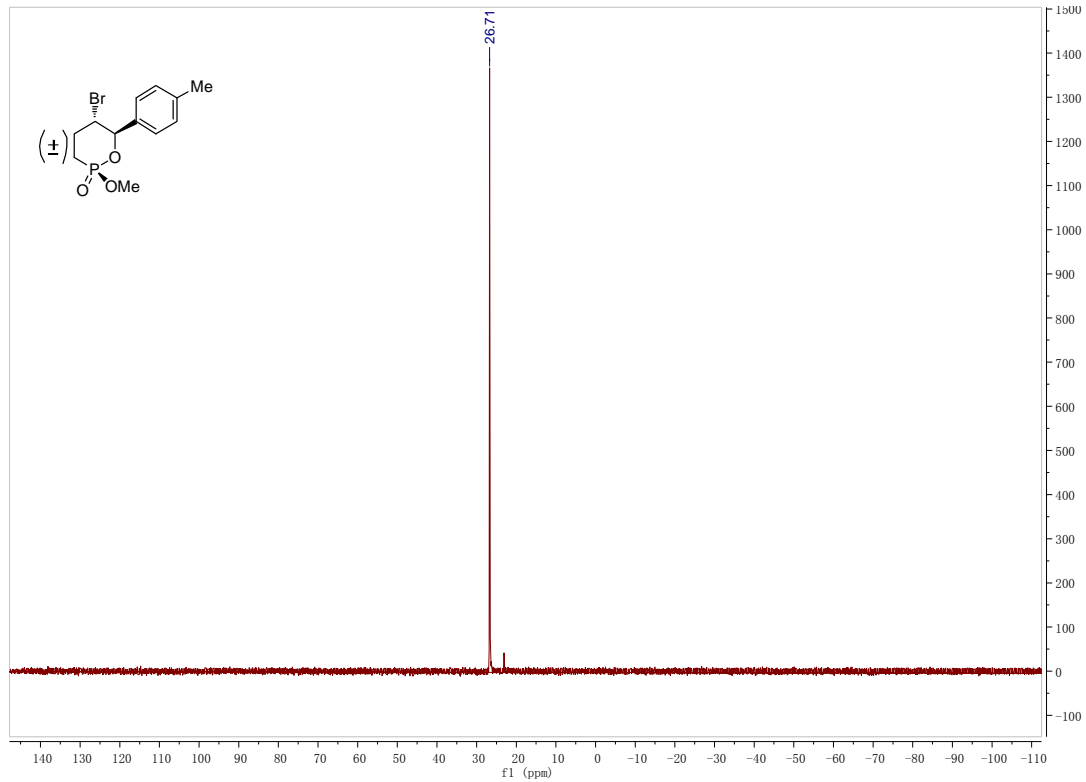

$^{13}\text{C}$  NMR (101 MHz,  $\text{CDCl}_3$ ) of **6fa**

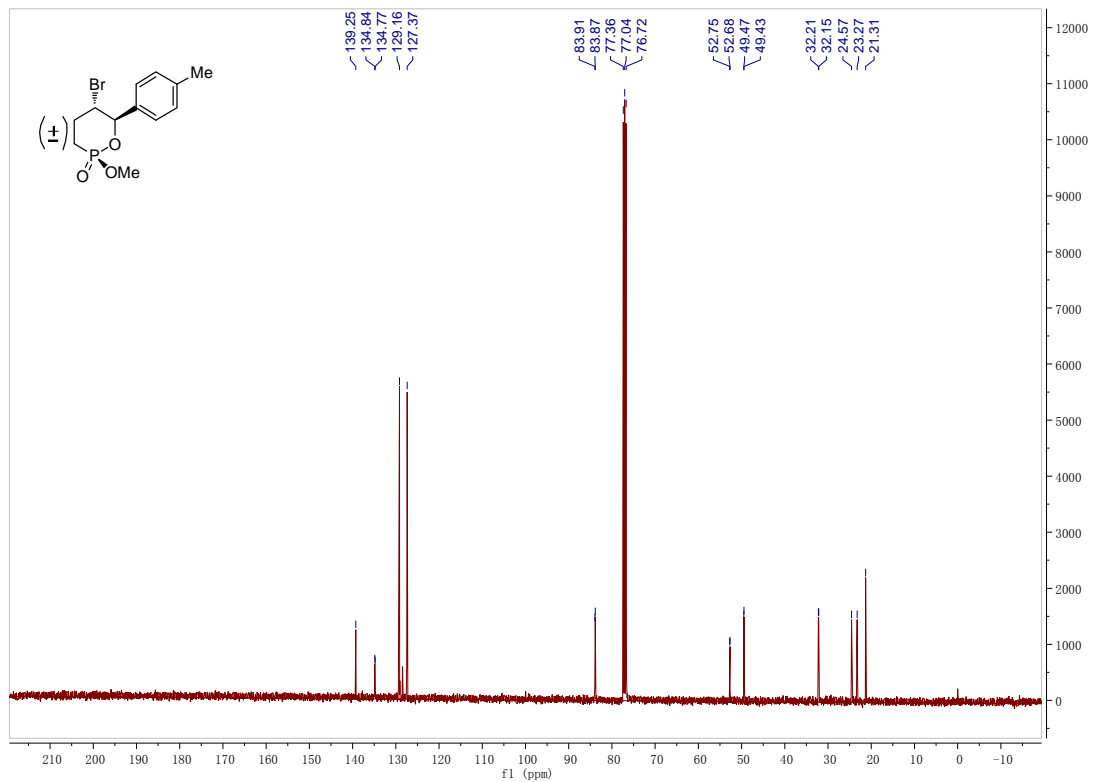

$^1\text{H}$  NMR (400 MHz,  $\text{CDCl}_3$ ) of **6fb**

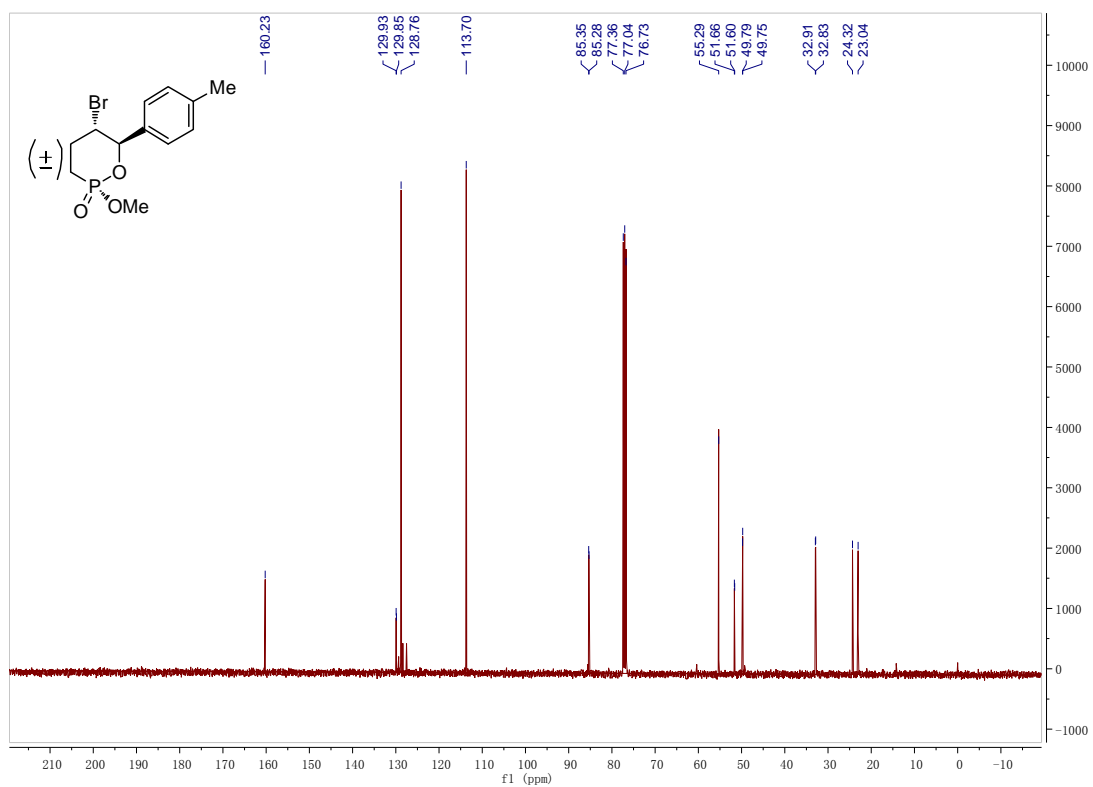

$^{31}\text{P}$  NMR (162 MHz,  $\text{CDCl}_3$ ) of **6fb**

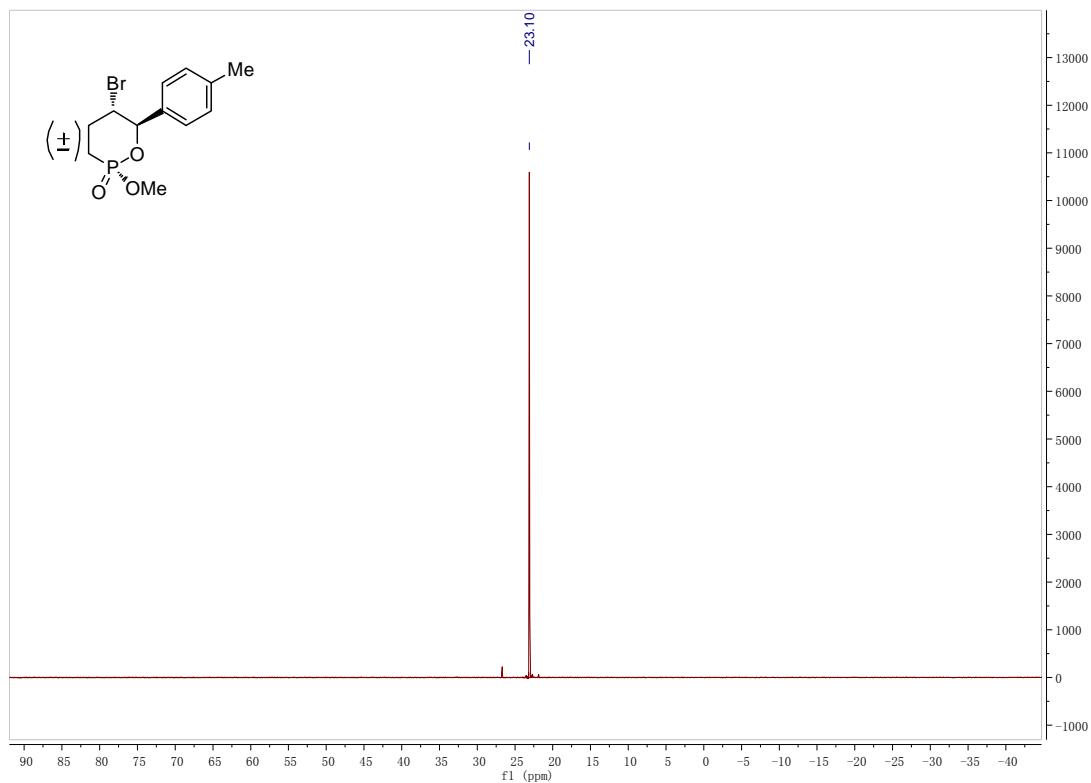

$^{13}\text{C}$  NMR (101 MHz,  $\text{CDCl}_3$ ) of **6fb**

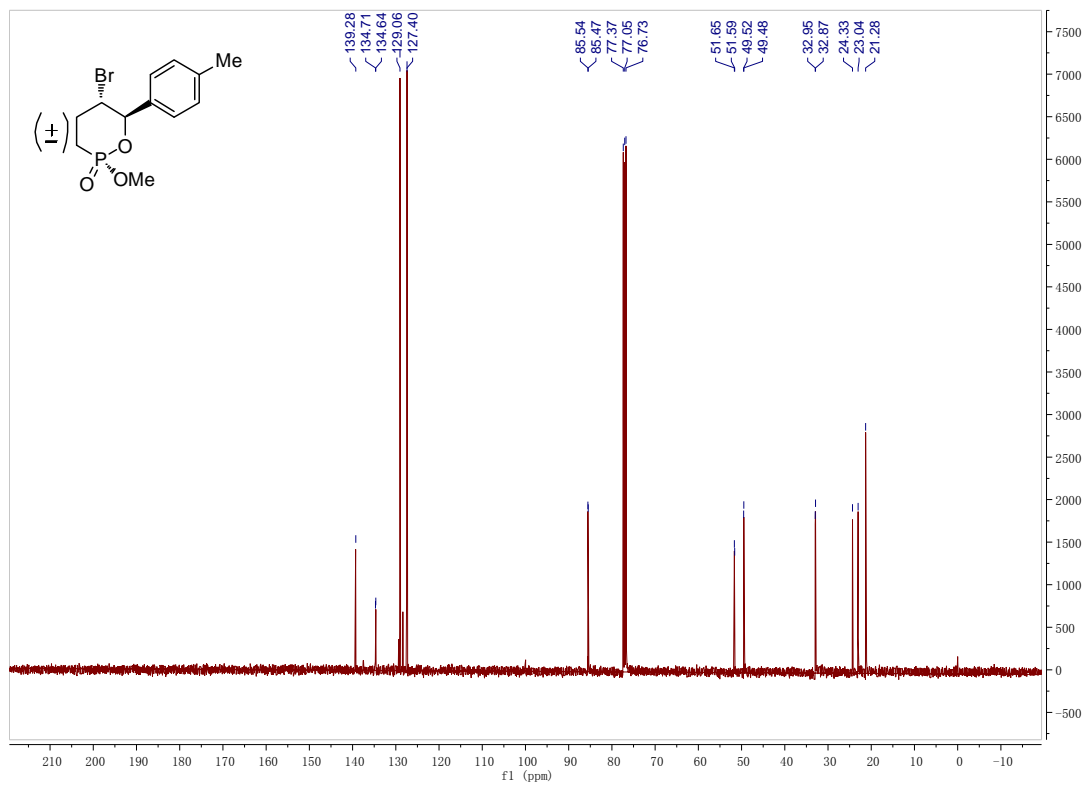

$^1\text{H}$  NMR (400 MHz,  $\text{CDCl}_3$ ) of **6ga**

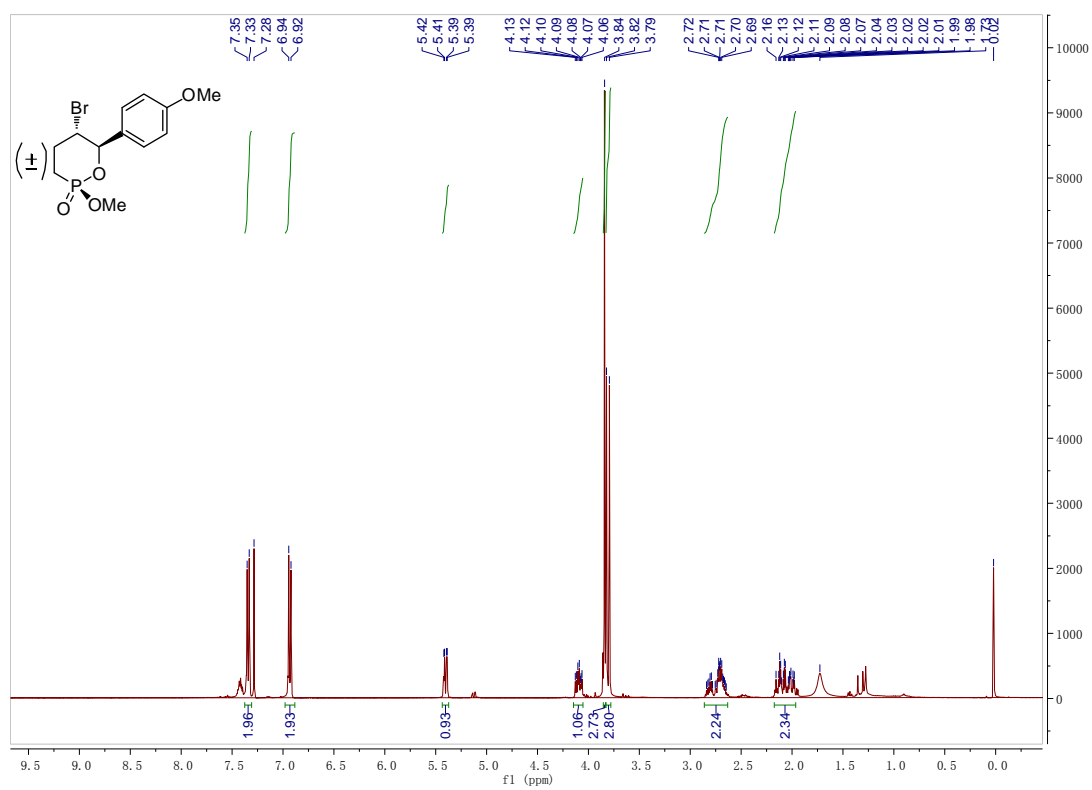

$^{31}\text{P}$  NMR (162 MHz,  $\text{CDCl}_3$ ) of **6ga**

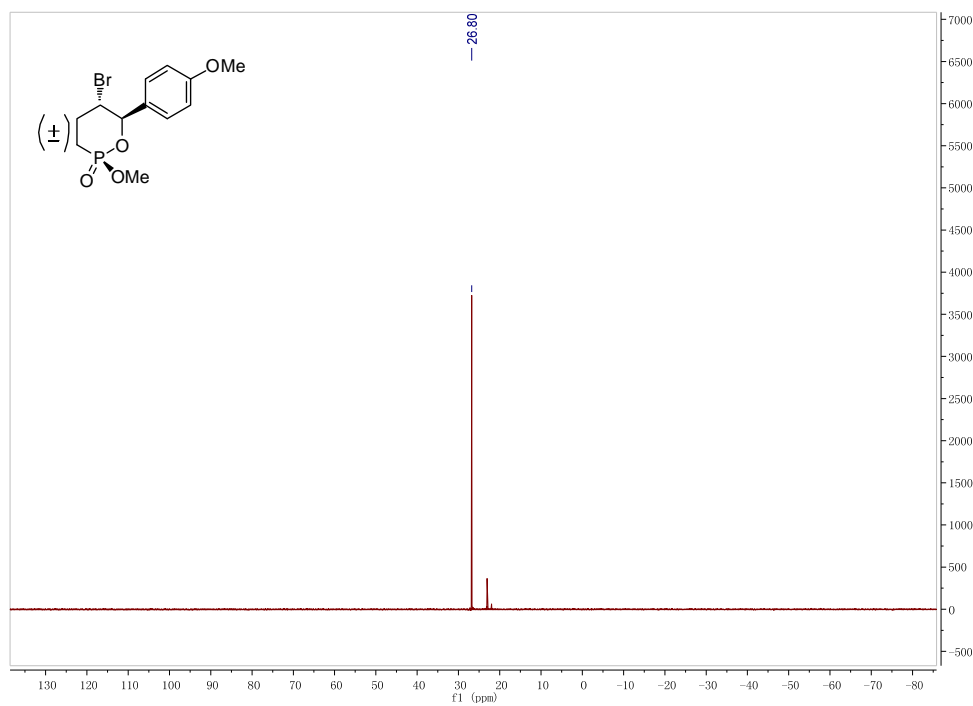

<sup>13</sup>C NMR (101 MHz, CDCl<sub>3</sub>) of **6ga**

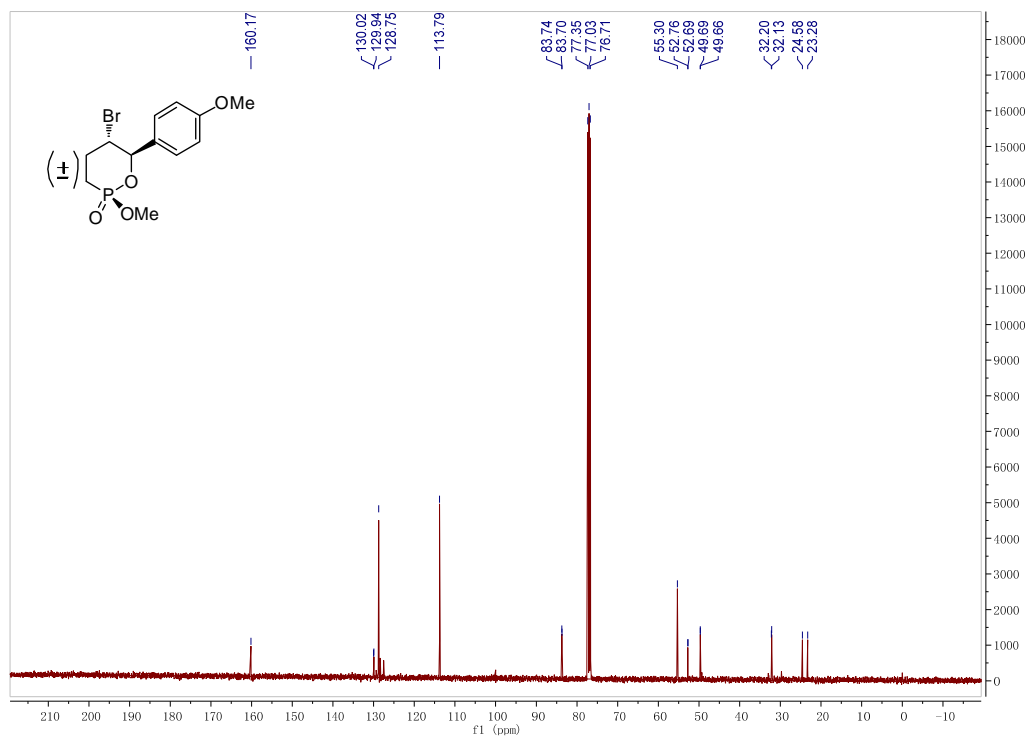

<sup>1</sup>H NMR (400 MHz, CDCl<sub>3</sub>) of **6gb**

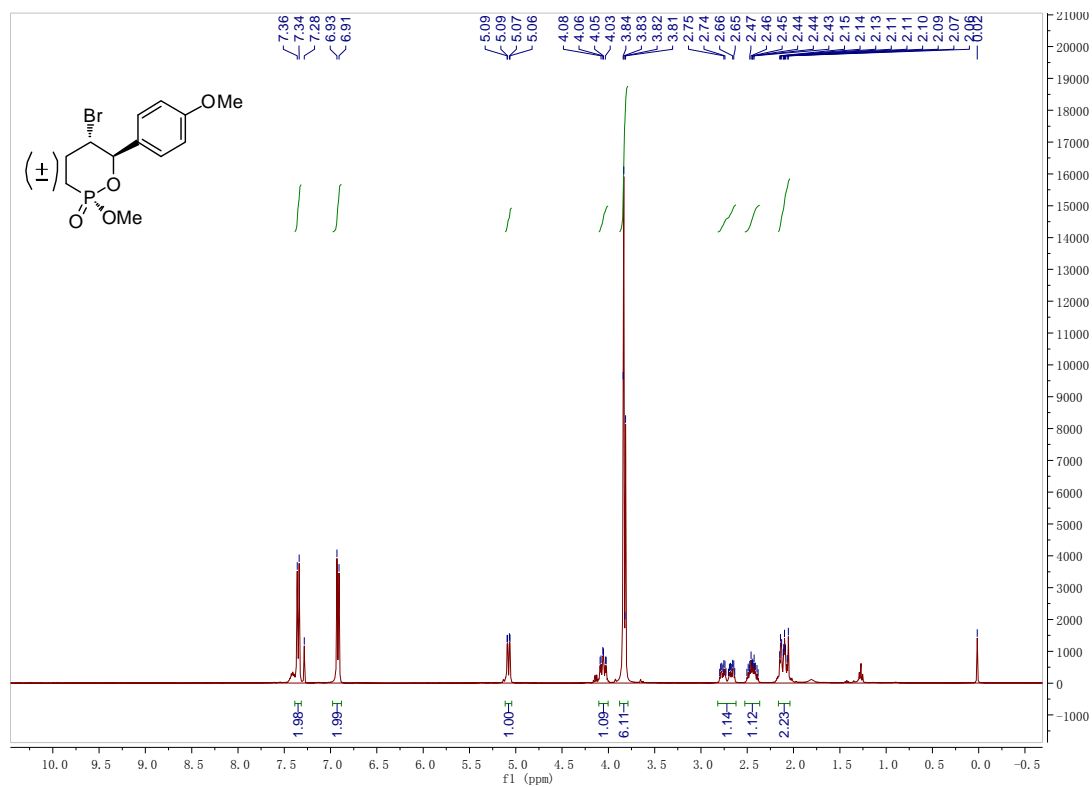

<sup>31</sup>P NMR (162 MHz, CDCl<sub>3</sub>) of **6b**

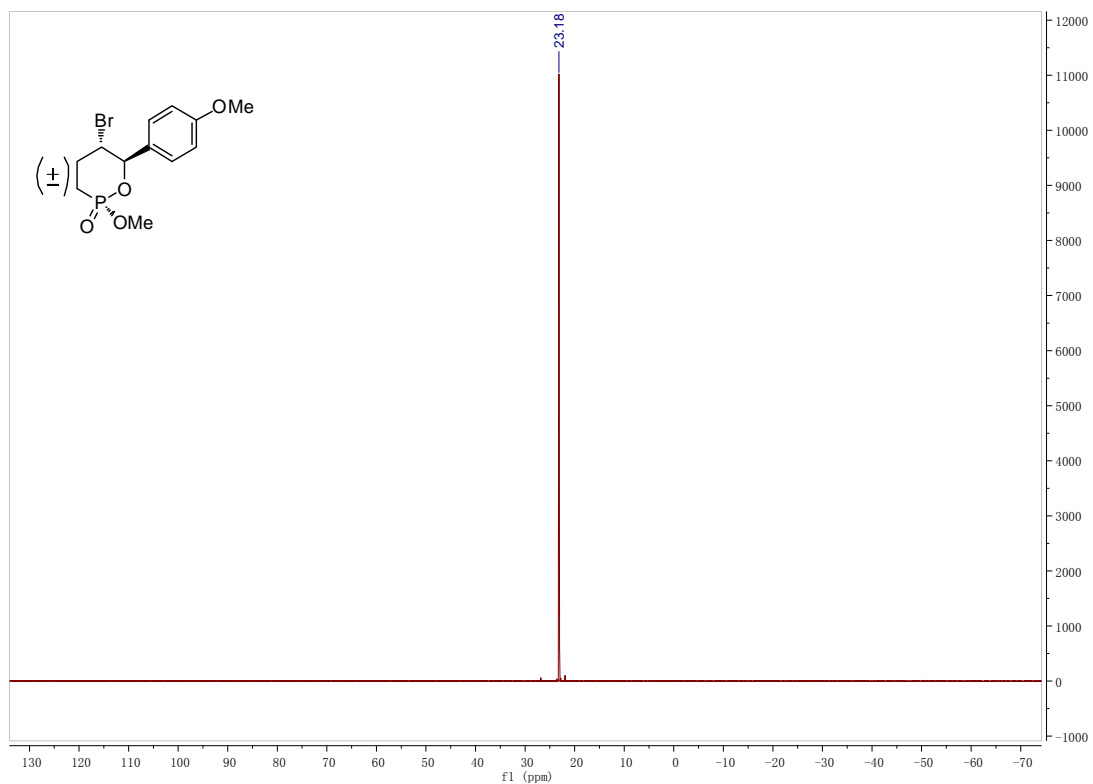

<sup>13</sup>C NMR (101 MHz, CDCl<sub>3</sub>) of **6b**

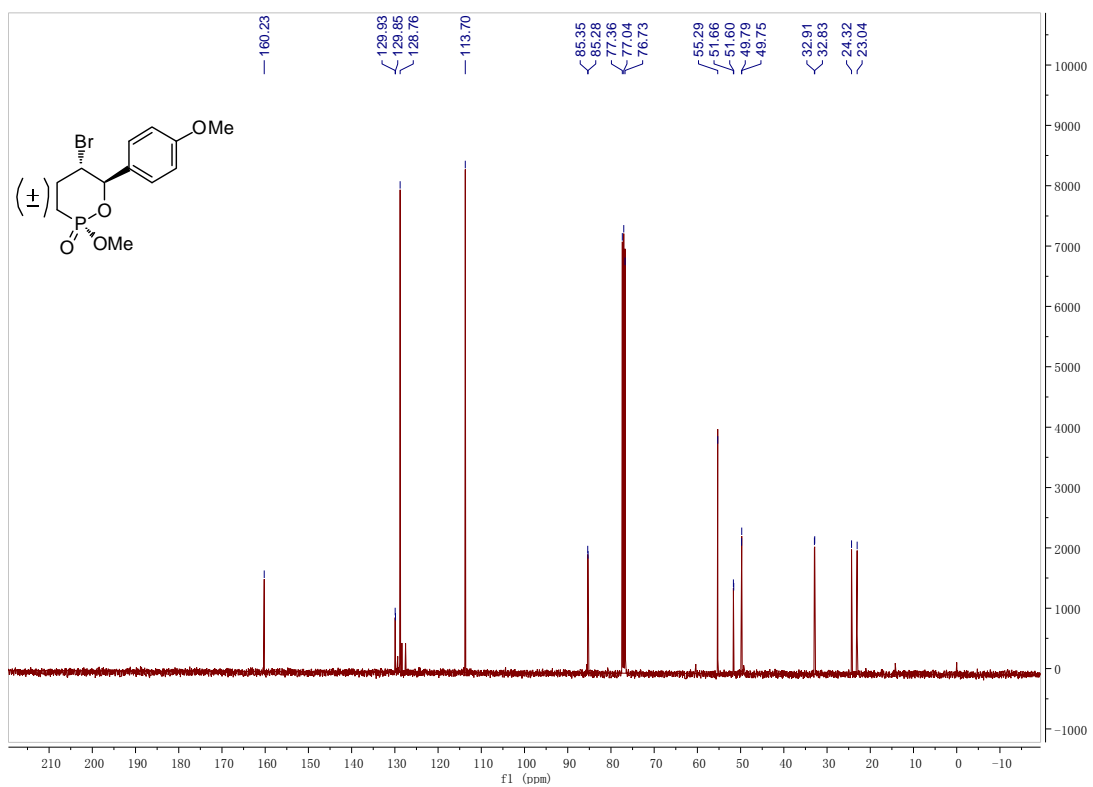

# NOE spectra for 6aa

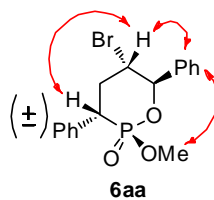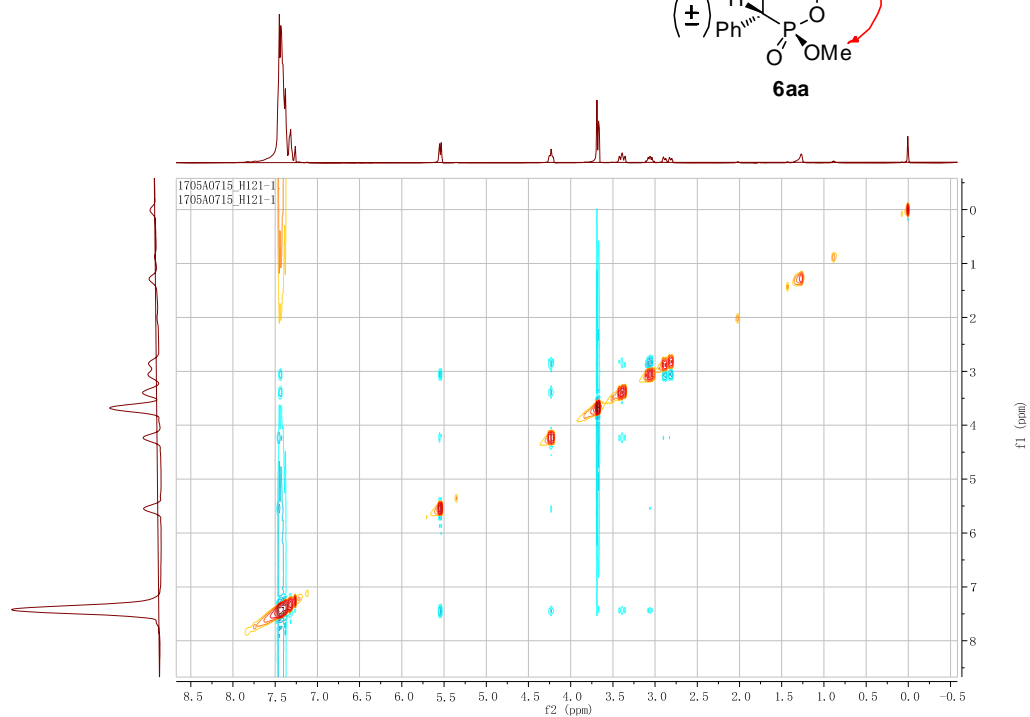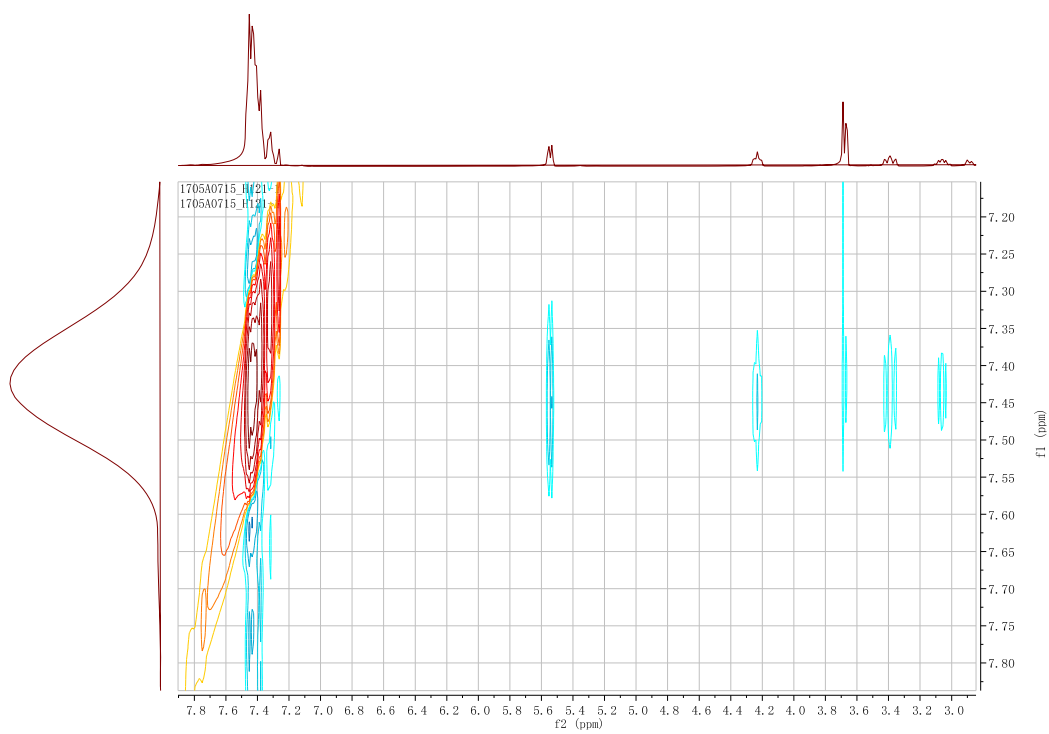



NOE spectra for 6aa

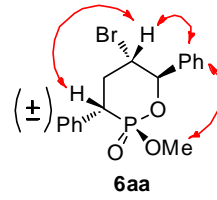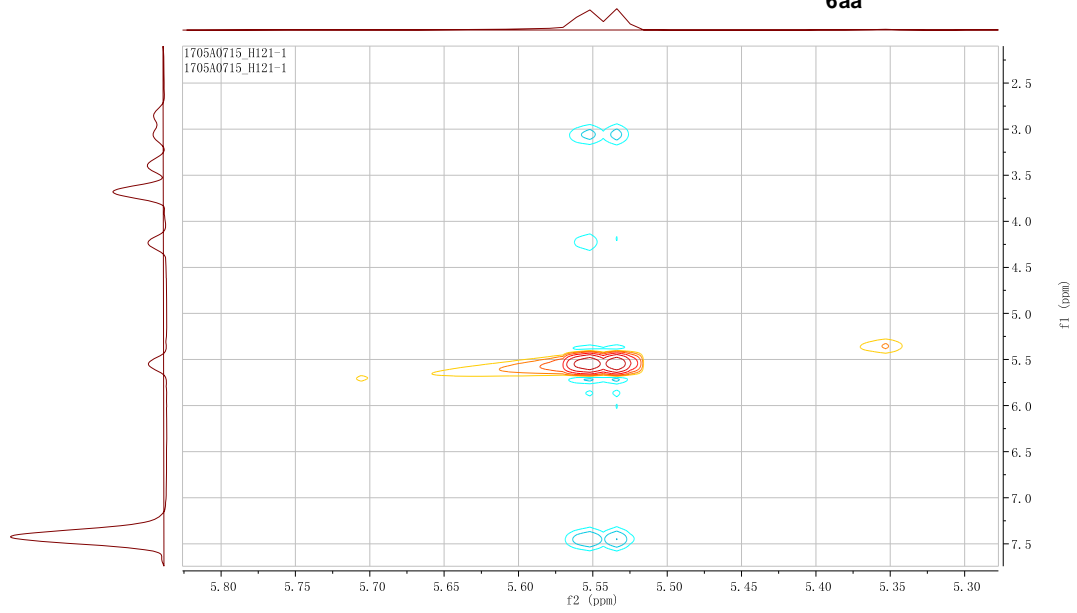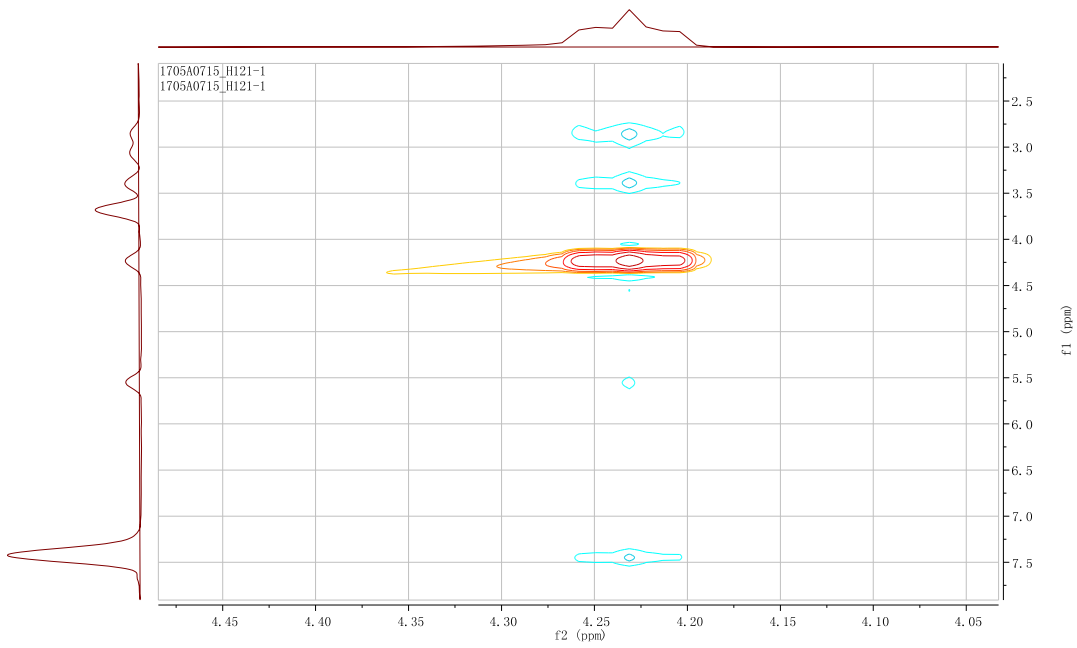

# NOE spectra for 6ab

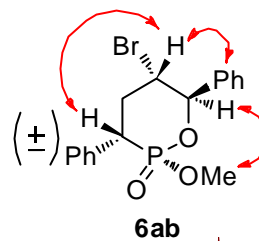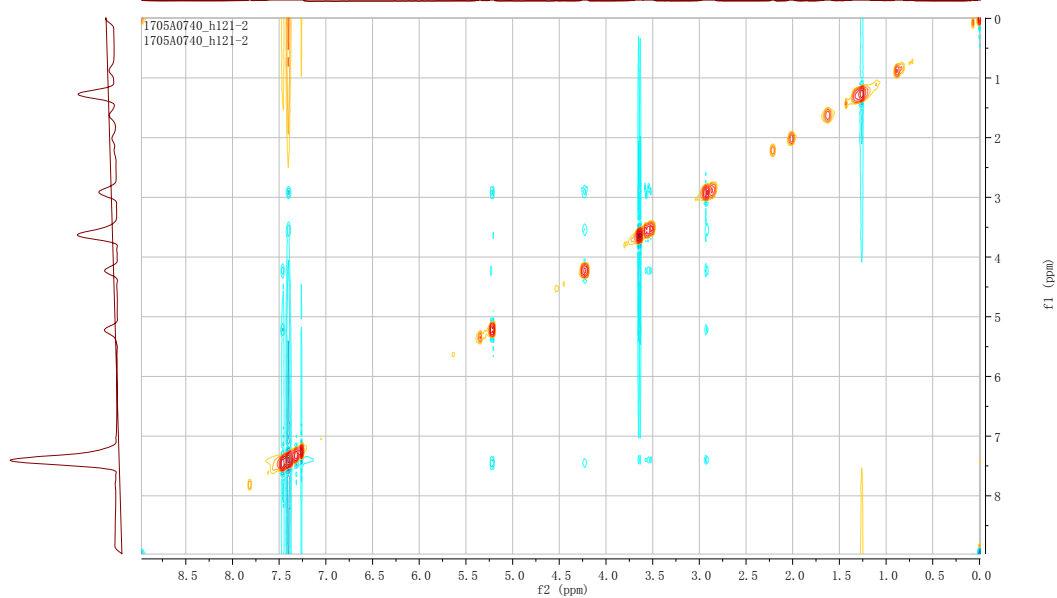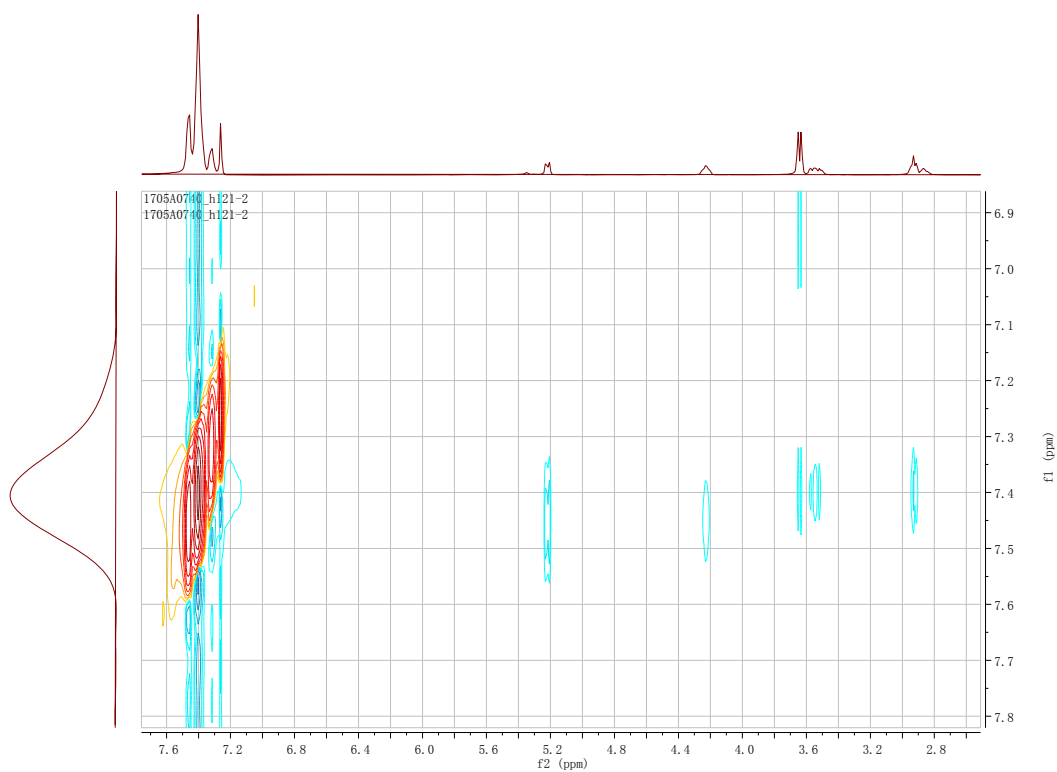

# NOE spectra for 6ab

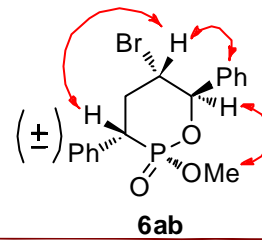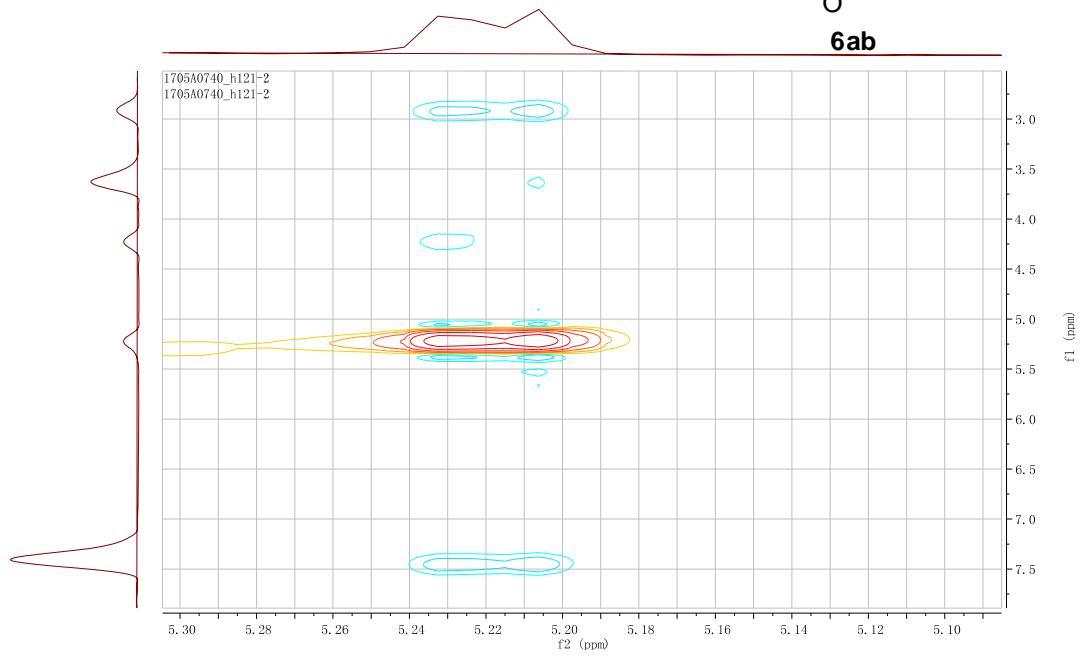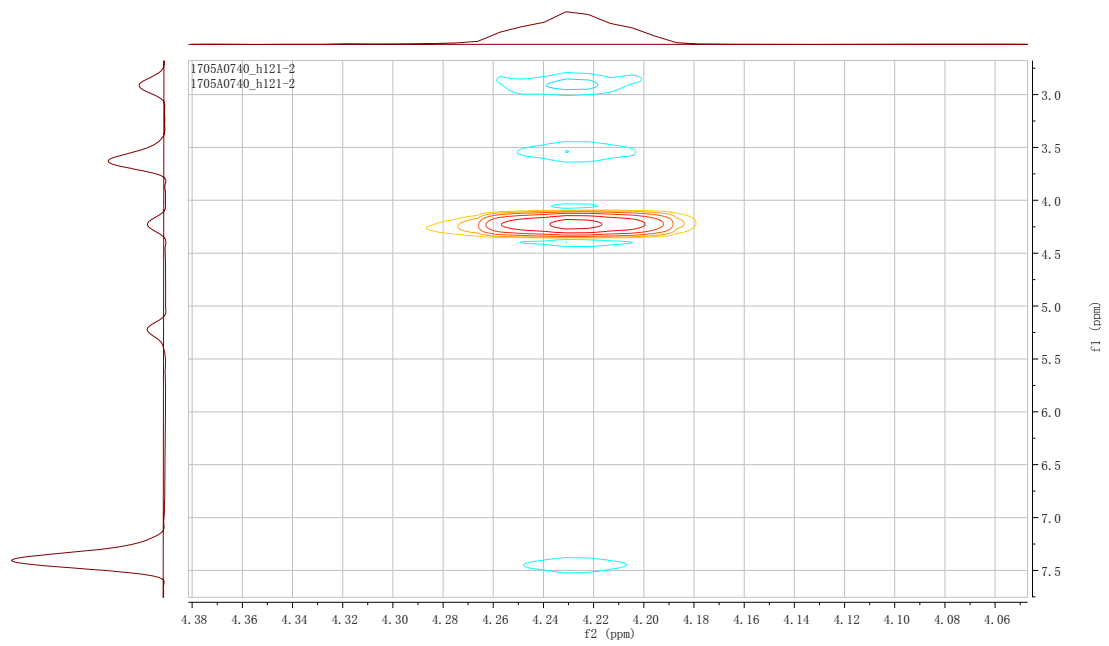

NOE spectra for 6ca

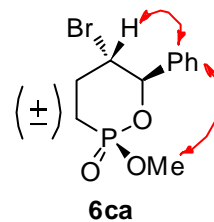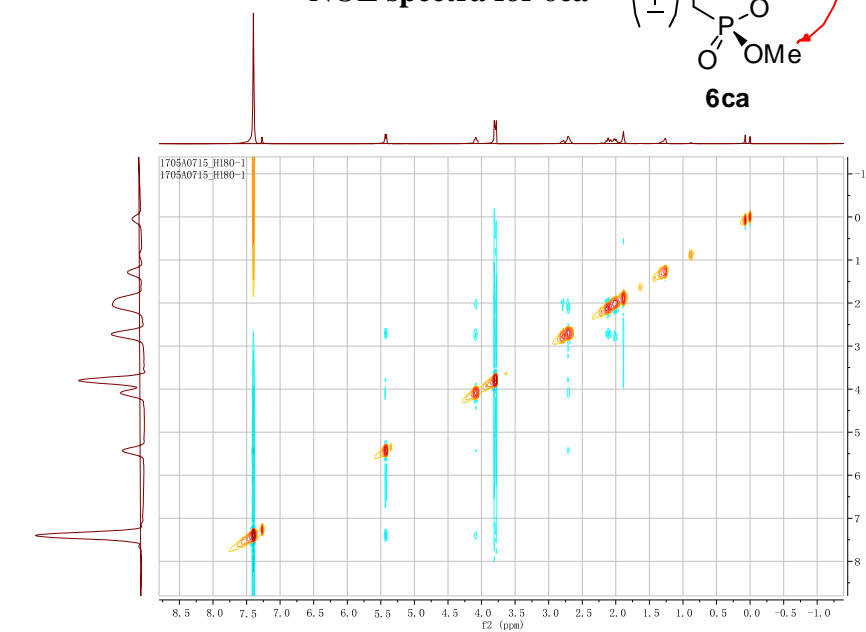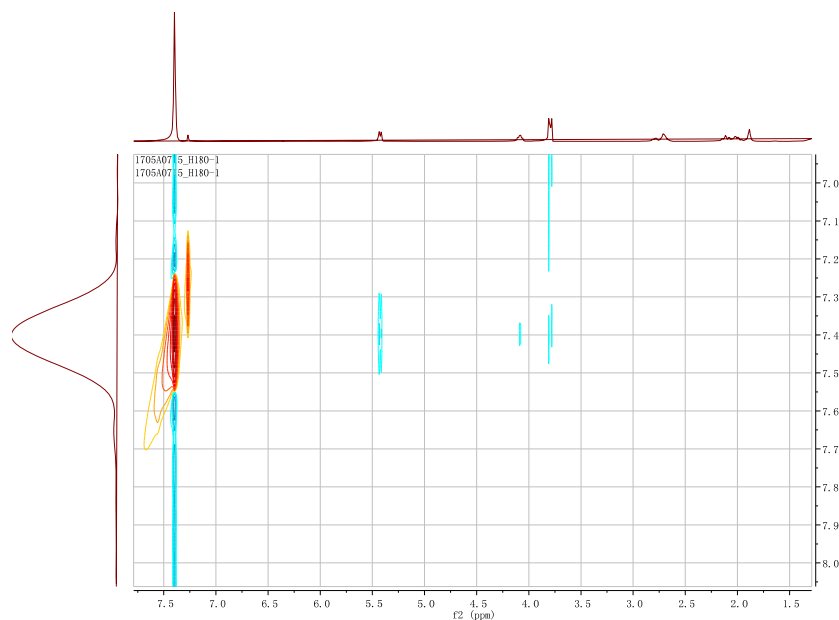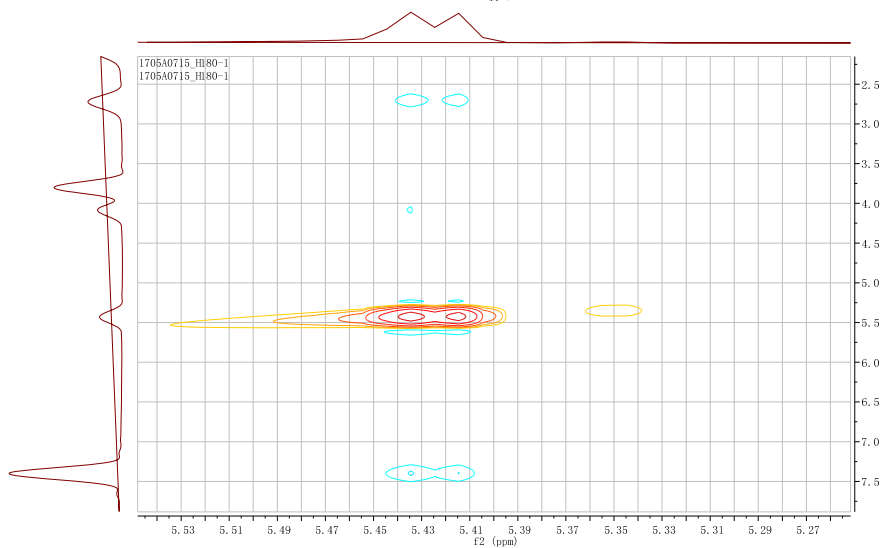

# NOE spectra for 6cb

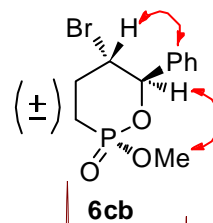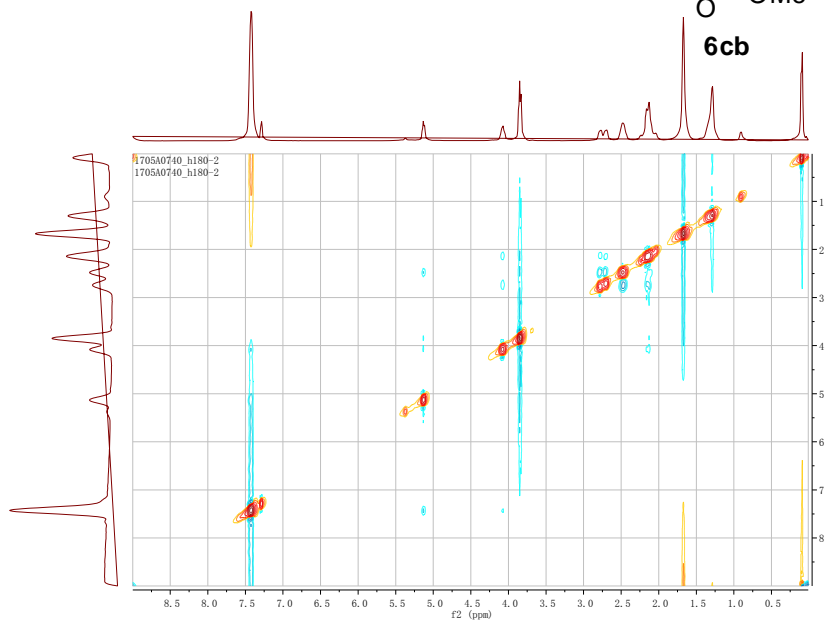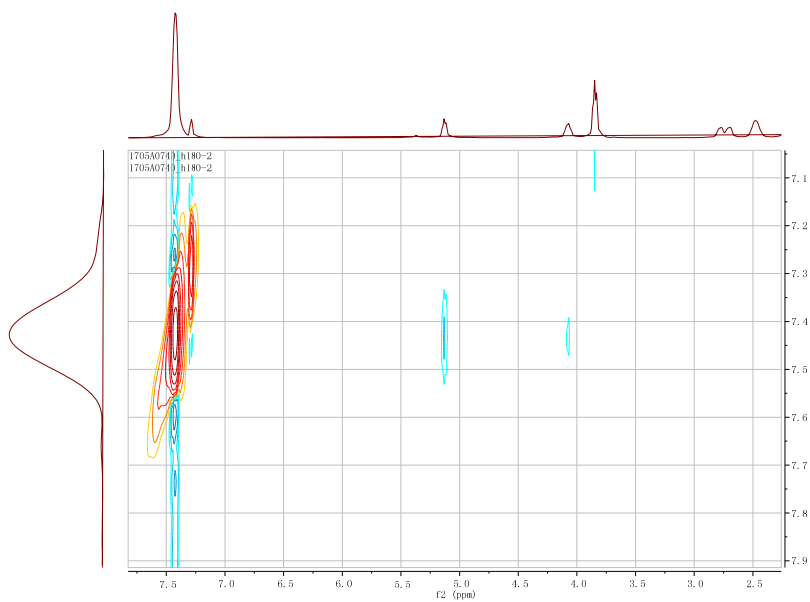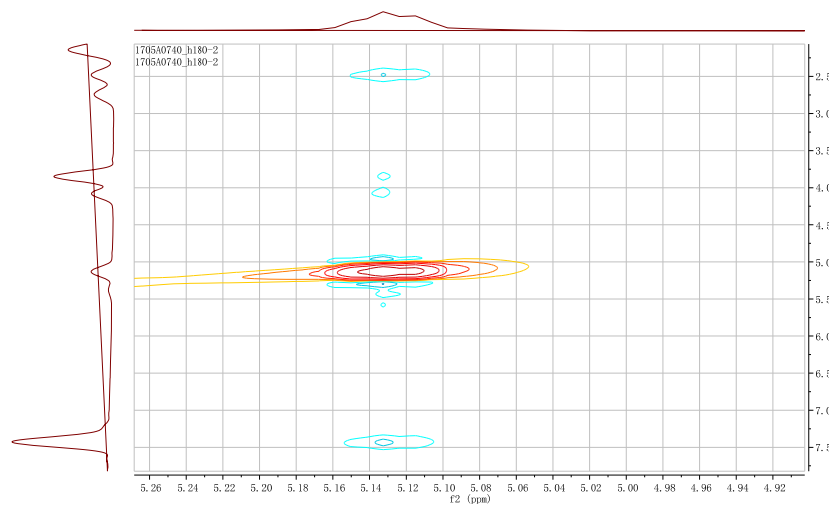

# The X-Ray crystallography of 6ba

## checkCIF/PLATON report

Structure factors have been supplied for datablock(s) A

THIS REPORT IS FOR GUIDANCE ONLY. IF USED AS PART OF A REVIEW PROCEDURE FOR PUBLICATION, IT SHOULD NOT REPLACE THE EXPERTISE OF AN EXPERIENCED CRYSTALLOGRAPHIC REFEREE.

No syntax errors found.    CIF dictionary    Interpreting this report

### Datablock: A

---

Bond precision:    C-C = 0.0105 A                      Wavelength=1.54178  
Cell:                      a=5.4900(2)              b=19.9165(6)              c=18.1684(8)  
                                    alpha=90                      beta=94.993(4)              gamma=90  
Temperature:              293 K

|                | Calculated      | Reported           |
|----------------|-----------------|--------------------|
| Volume         | 1979.02(13)     | 1979.02(13)        |
| Space group    | P 21/c          | P 21/c             |
| Hall group     | -P 2ybc         | -P 2ybc            |
| Moiety formula | C21 H20 Br O3 P | ?                  |
| Sum formula    | C21 H20 Br O3 P | C21 H20 Br N0 O3 P |
| Mr             | 431.24          | 431.25             |
| Dx, g cm-3     | 1.447           | 1.447              |
| Z              | 4               | 4                  |
| Mu (mm-1)      | 3.738           | 3.738              |
| F000           | 880.0           | 880.0              |
| F000'          | 880.52          |                    |
| h,k,lmax       | 6,22,20         | 6,22,20            |
| Nref           | 2943            | 2938               |
| Tmin,Tmax      | 0.428,0.474     |                    |
| Tmin'          | 0.147           |                    |

Correction method= Not given

Data completeness= 0.998                      Theta(max) = 59.995

R(reflections)= 0.0613( 2417)                      wR2(reflections)= 0.1800( 2938)

S = 1.074                                      Npar= 236

---

The following ALERTS were generated. Each ALERT has the format  
**test-name\_ALERT\_alert-type\_alert-level**.  
Click on the hyperlinks for more details of the test.

---

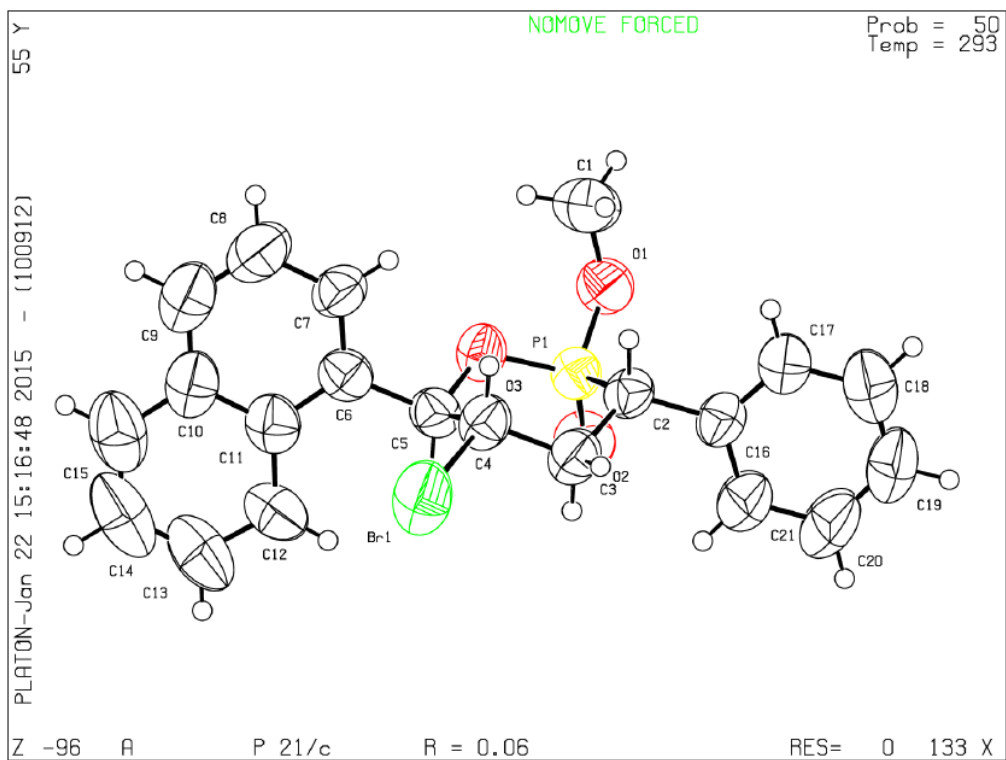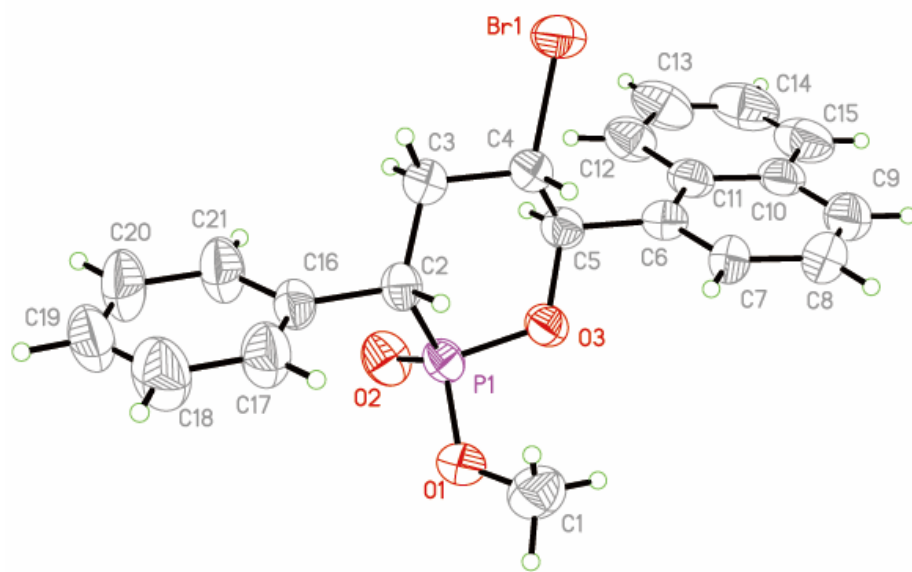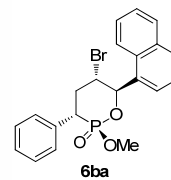

Supplement: c7ob01436h1.pdf [file c7ob01436h1.pdf]
